# Supplementary material for: Smartphones, social Media and Adolescent mental well-being: the impact of school policies Restricting dayTime use—protocol for a natural experimental observational study using mixed methods at secondary schools in England (SMART Schools Study)
Source: PubMed Central journal article supplement (PMC10335462; doi:10.1136/bmjopen-2023-075832), 2023-07-05
Supplement: bmjopen-2023-075832.draft_revisions.pdf [file bmjopen-2023-075832.draft_revisions.pdf]

# BMJ Open

BMJ Open is committed to open peer review. As part of this commitment we make the peer review history of every article we publish publicly available.

When an article is published we post the peer reviewers' comments and the authors' responses online. We also post the versions of the paper that were used during peer review. These are the versions that the peer review comments apply to.

The versions of the paper that follow are the versions that were submitted during the peer review process. They are not the versions of record or the final published versions. They should not be cited or distributed as the published version of this manuscript.

BMJ Open is an open access journal and the full, final, typeset and author-corrected version of record of the manuscript is available on our site with no access controls, subscription charges or pay-per-view fees (<http://bmjopen.bmj.com>).

If you have any questions on BMJ Open's open peer review process please email [info.bmjopen@bmj.com](mailto:info.bmjopen@bmj.com)

# BMJ Open

## The SMART Schools Study Protocol: Smartphones, social Media and Adolescent mental wellbeing: the impact of school policies Restricting dayTime use

|                               |                                                                                                                                                                                                                                                                                                                                                                                                                                                                                                                                                                                                                                                                                                                                                                                                                                                                                                                                                                                                                                                                                                                                                                                                                                                                                                                                                                                                                                                                                                                                        |
|-------------------------------|----------------------------------------------------------------------------------------------------------------------------------------------------------------------------------------------------------------------------------------------------------------------------------------------------------------------------------------------------------------------------------------------------------------------------------------------------------------------------------------------------------------------------------------------------------------------------------------------------------------------------------------------------------------------------------------------------------------------------------------------------------------------------------------------------------------------------------------------------------------------------------------------------------------------------------------------------------------------------------------------------------------------------------------------------------------------------------------------------------------------------------------------------------------------------------------------------------------------------------------------------------------------------------------------------------------------------------------------------------------------------------------------------------------------------------------------------------------------------------------------------------------------------------------|
| Journal:                      | <i>BMJ Open</i>                                                                                                                                                                                                                                                                                                                                                                                                                                                                                                                                                                                                                                                                                                                                                                                                                                                                                                                                                                                                                                                                                                                                                                                                                                                                                                                                                                                                                                                                                                                        |
| Manuscript ID                 | bmjopen-2023-075832                                                                                                                                                                                                                                                                                                                                                                                                                                                                                                                                                                                                                                                                                                                                                                                                                                                                                                                                                                                                                                                                                                                                                                                                                                                                                                                                                                                                                                                                                                                    |
| Article Type:                 | Protocol                                                                                                                                                                                                                                                                                                                                                                                                                                                                                                                                                                                                                                                                                                                                                                                                                                                                                                                                                                                                                                                                                                                                                                                                                                                                                                                                                                                                                                                                                                                               |
| Date Submitted by the Author: | 19-May-2023                                                                                                                                                                                                                                                                                                                                                                                                                                                                                                                                                                                                                                                                                                                                                                                                                                                                                                                                                                                                                                                                                                                                                                                                                                                                                                                                                                                                                                                                                                                            |
| Complete List of Authors:     | <p>Wood, Grace; University of Birmingham, School of Sport, Exercise and Rehabilitation Sciences; University of Birmingham Institute for Mental Health</p> <p>Goodyear, Victoria; University of Birmingham School of Sport and Exercise Sciences; University of Birmingham Institute for Mental Health</p> <p>Adab, Peymane; University of Birmingham Institute of Applied Health Research, Public Health</p> <p>Al-Janabi, Hareth; University of Birmingham Institute for Mental Health; University of Birmingham Institute of Applied Health Research</p> <p>Fenton, Sally; University of Birmingham School of Sport and Exercise Sciences, School of Sport, Exercise and Rehabilitation Sciences</p> <p>Jones, Kirsty; Services for Education</p> <p>Michail, Maria; University of Birmingham Institute for Mental Health; University of Birmingham School of Psychology</p> <p>Morrison, Breanna; University of Birmingham Institute of Applied Health Research</p> <p>Patterson, Paul; University of Birmingham Institute for Mental Health; Birmingham Women's and Children's NHS Foundation Trust</p> <p>Sitch, Alice; University of Birmingham Institute of Applied Health Research; NIHR Birmingham Biomedical Research Centre, Institute of Translational Medicine</p> <p>Wade, Matthew; ukactive Research Institute; Sheffield Hallam University College of Health Wellbeing and Life Sciences, Advanced Wellbeing Research Centre</p> <p>Pallan, Miranda; University of Birmingham Institute of Applied Health Research</p> |
| Keywords:                     | Adolescent, MENTAL HEALTH, Schools                                                                                                                                                                                                                                                                                                                                                                                                                                                                                                                                                                                                                                                                                                                                                                                                                                                                                                                                                                                                                                                                                                                                                                                                                                                                                                                                                                                                                                                                                                     |
|                               |                                                                                                                                                                                                                                                                                                                                                                                                                                                                                                                                                                                                                                                                                                                                                                                                                                                                                                                                                                                                                                                                                                                                                                                                                                                                                                                                                                                                                                                                                                                                        |

SCHOLARONE™  
Manuscripts

1  
2  
3 **The SMART Schools Study Protocol: Smartphones, social Media and**  
4 **Adolescent mental wellbeing: the impact of school policies Restricting dayTime**  
5 **use**  
6

7  
8 **Authors:** Grace Wood<sup>1,2</sup>, Victoria A. Goodyear<sup>1,2\*</sup>, Peymane Adab<sup>3</sup>, Hareth Al-Janabi<sup>2,3</sup>,  
9 Sally Fenton<sup>1</sup>, Kirsty Jones<sup>4</sup>, Maria Michail<sup>2,5</sup>, Breanna Morrison<sup>3</sup>, Paul Patterson<sup>2,6</sup>, Alice  
10 Sitch<sup>3,7</sup>, Matthew Wade<sup>8,9</sup>, Miranda Pallan<sup>3</sup>.  
11

12 **Institutional Affiliations:**

13 <sup>1</sup>School of Sport, Exercise and Rehabilitation Sciences, University of Birmingham UK

14 <sup>2</sup>Institute for Mental Health, University of Birmingham UK

15 <sup>3</sup>Institute of Applied Health Research, University of Birmingham UK

16 <sup>4</sup>Services for Education, Birmingham UK

17 <sup>5</sup>School of Psychology, University of Birmingham UK

18 <sup>6</sup>Birmingham Women's and Children's NHS Foundation Trust, Birmingham UK

19 <sup>7</sup>NIHR Birmingham Biomedical Research Centre, University Hospitals Birmingham NHS  
20 Foundation Trust and University of Birmingham, Institute of Translational Medicine,  
21 Birmingham UK

22 <sup>8</sup>ukactive, ukactive Research Institute, London UK

23 <sup>9</sup>Advanced Wellbeing Research Centre, College of Health, Wellbeing and Life Sciences,  
24 Sheffield Hallam University, Sheffield, UK  
25

26  
27 **\*Corresponding Author:** Dr Victoria Goodyear: [v.a.goodyear@bham.ac.uk](mailto:v.a.goodyear@bham.ac.uk)  
28  
29  
30  
31  
32  
33  
34  
35  
36  
37  
38  
39  
40  
41  
42  
43  
44  
45  
46  
47  
48  
49  
50  
51  
52  
53  
54  
55  
56  
57  
58  
59  
60

## ABSTRACT

**Introduction:** Smartphone and social media use is prevalent during adolescence, with high levels of use associated with lower levels of mental wellbeing. Secondary schools in the UK have introduced policies that restrict daytime use of smartphones and social media, but there is no evaluation on the impact of these policies on adolescent mental wellbeing. The SMART Schools Study aims to determine the impact of daytime restrictions of smartphone and social media use on indicators of adolescent mental wellbeing, anxiety, depression, physical activity, sleep, classroom behaviour, attainment and addictive social media use.

**Methods and analysis:** Secondary schools within a 100-mile radius of the recruiting centre in the West Midlands (UK) have been categorised into two groups: Schools that restrict (intervention) and permit (comparator) daytime use of smartphones. Employing propensity scores to guide a stratified random sampling approach, we aim to recruit 30 schools (20 restrictive, 10 permissive) and 1170 pupils aged 12-13 and 14-15 years. We will collect data on mental wellbeing, anxiety and depressive symptoms, addictive social media use, sleep and physical activity through online surveys with pupils, and accelerometers. Policy implementation measures and data on individual pupil factors will be collected through surveys with school staff. We will explore smartphone policy content, development, and implementation through document analysis of school policies and websites. Six case study schools will be selected and focus groups with school staff, parents/carers and pupils will explore individual, school and family/home factors that influence relationships between school smartphone policies, smartphone and social media use, and mental wellbeing. Economic evaluation will be completed through a cost-consequence analysis from an education sector perspective.

**Ethics and dissemination:** Ethical approval was obtained from the University of Birmingham's Ethics Committee (ERN\_22-0723). Findings will be disseminated through policy briefings, resources for secondary schools, social media, public reports, and peer reviewed open access publications.

**Trial and registration:** ISRCTN77948572 and CRN 52232

### Strengths and Limitations of this study

- This study addresses a knowledge gap by exploring the impact of school phone policies that restrict daytime use of smartphones and social media on adolescent mental wellbeing and associated behaviours, and the cost implications of these policies from the education sector perspective.
- Pupil outcomes will be collected from; an online survey that includes validated measures for mental wellbeing, anxiety and depressive symptoms, addictive social media use, motives for social media use, health-related quality of life and demographic data; and from accelerometers measuring physical activity and sleep.

- Pupils will self-report data in the online survey on time spent on their smartphone and specific social media apps by using data from their phones using iOS or Android apps.
- Data on pupil attainment, classroom behavior, implementation of school phone policies, and variables for an economic evaluation will be collected from school staff surveys and document analysis.
- Qualitative data will be collected from case study schools to further explore how individual, school and family/home factors influence relationships between school phone policies, phone/media use and mental wellbeing.

## KEY WORDS

Smartphones, Social Media, Adolescent Health, Mental Health, Physical Activity, Secondary Schools, School Policy

## INTRODUCTION

Globally, mental disorders (e.g. anxiety and depression) are the leading cause of disability in adolescents (age range 10-19) [1, 2]. In the UK, one fifth of adolescents (20%) are reported to have a mental health disorder [3], mostly anxiety and depression [2]. Half of all mental health disorders start before the age of 14 [4, 5], and if left untreated, mental health problems are highly likely to persist well into adulthood [2, 6]. Poor mental wellbeing also negatively affects other aspects of adolescents' lives, including cognitive, social and physical behaviours [6, 7]. For example, poor mental wellbeing is associated with higher rates of disruptive behaviour, school absence and lower educational attainment [8, 9]. Sleep problems are also common among adolescents diagnosed with anxiety and depression, and evidence suggests a bidirectional relationship between sleep disturbances and mental health problems [10]. Levels of physical activity also decline significantly during adolescence, and this coincides with increased onset of mental health problems [4, 11]. Hence, adolescence is a crucial period for mental health intervention [7], and there is a pressing need to improve and develop approaches to mental health prevention and intervention [6].

Smartphone and social media use is prevalent during adolescence, and accounts for the majority of their overall screen time [12, 13]. In the UK, most adolescents own a smartphone (98%), and are reported to be active users of social media (93%) [14], with comparable trends reported in other Western populations [15]. Samples in the US and the UK (2021-2022) estimate that the time adolescents spend on smartphones and social media ranges between one and a half hours and eight and a half hours per day [12-14, 16, 17], with most adolescents spending between one and three hours per day [14, 16, 17]. Problematic social media use is also prevalent, with 12% of adolescents in England reported to exhibit addictive use behaviours [18].

In moderation, smartphone and social media use (e.g., <2 hours per day) can be advantageous for mental wellbeing and mental health [19-24], as well as other associated health and behavioural outcomes (e.g. sleep, physical activity, classroom behaviour and attainment). However, at higher levels of use, the reverse effect tends to be seen, with increasing time spent on smartphones and social media associated with decreasing levels of mental wellbeing and higher levels of anxiety and depression

1  
2  
3 [17, 19-21, 23, 25, 26]. Poor academic performance, disruptive classroom behaviour  
4 and less time spent in physical activity and sleep are also more likely in adolescents  
5 who spend a greater proportion of time on smartphones and/or social media [19-23,  
6 25, 26]. Reducing the time adolescents spend on smartphones and social media is  
7 thus a plausible intervention to improve mental wellbeing, possibly operating through  
8 improving the related behavioural outcomes (e.g., physical activity, sleep, academic  
9 performance, classroom behaviour). However, uncertainties in the strength of  
10 associations between smartphone/social media and mental wellbeing exist, and this  
11 is mainly due to reliance on self-reported use [15, 27-29]. Furthermore, individual (e.g.  
12 gender, age, socio-economic status) [13, 16, 30-33] and family/home (e.g. parental  
13 usage and attitudes toward technology) [34-37] factors are also likely to impact on  
14 relationships between smartphone/social media use and mental wellbeing.  
15  
16  
17  
18  
19  
20  
21  
22  
23  
24  
25

26 There is considerable evidence that school-based interventions can have beneficial  
27 effects on adolescent mental wellbeing and associated behavioural outcomes (e.g.,  
28 sleep, physical activity, classroom behaviour and attainment) [38-41]. Whole-school  
29 environment interventions that promote lifestyles conducive to good health are  
30 reported to have a more pronounced effect on mental wellbeing than individual  
31 approaches targeting knowledge and beliefs [38, 42]. A whole-school approach  
32 targets physical and social influences of health, and through the alignment of school  
33 policies, values and practices with effective school leadership, the whole school  
34 approach seeks to promote a set of values, attitudes and behaviours that encourage  
35 the development and maintenance of positive physical, social, cognitive and emotional  
36 habits [38, 40]. Evidence suggests that whole school policies related to health and  
37 wellbeing can: (i) reduce overall screen time; (ii) positively influence mental wellbeing;  
38 and (iii) improve physical activity, sleep, educational attainment and reduce disruptive  
39 classroom behaviour [43-45]. Therefore, whole school policies aiming to influence  
40 smartphone and social media use have the potential to positively impact on  
41 adolescents' mental wellbeing.  
42  
43  
44  
45  
46  
47  
48  
49  
50  
51  
52  
53  
54

55 School phone policies that restrict daytime phone/media use are an example of a  
56 current whole-school environment intervention. In the UK, Australia, Sweden, Czech  
57 Republic and elsewhere, many schools have introduced school policies that restrict  
58 daytime use of smartphones in order to reduce classroom disruptive behaviour and  
59  
60

1  
2  
3 cyberbullying incidents and improve attainment [44, 46, 47]. We suggest that these  
4 policies have the potential to lower the overall time adolescents spend on the  
5 smartphones/social media, which may improve mental wellbeing and associated  
6 behavioural outcomes. However, there is currently no evaluation of the effect of school  
7 smartphone policies on mental wellbeing and there is limited evidence on how  
8 smartphone policies are implemented in schools [48].  
9  
10  
11  
12  
13  
14

15 The SMART Schools Study aims to determine the impact of school daytime  
16 restrictions of smartphone and social media use on adolescent mental wellbeing  
17 (primary outcome), anxiety, depression, physical activity, sleep, classroom behaviour,  
18 attainment, and addictive social media use. We will do this by comparing impacts in  
19 two different secondary school phone policy contexts: (i) schools that do not permit  
20 smartphone use during recreational time in the school day (intervention); and (ii)  
21 schools that permit smartphone use during recreational time (breaks/lunchtimes)  
22 (comparator). We will also explore how variation in school-based, individual and  
23 family/home factors influence the relationship between school phone policies,  
24 smartphone and social media use and mental wellbeing. We will conduct an economic  
25 evaluation in the form of a cost-consequence analysis from an education sector  
26 perspective.  
27  
28  
29  
30  
31  
32  
33  
34  
35  
36  
37

## 38 **METHODS AND ANALYSIS**

39  
40 This is a natural experimental observational study using mixed methods. Quantitative  
41 and qualitative data will be collected from all schools in the sample (n = 30) to compare  
42 outcomes between restrictive (intervention) and permissive (comparator) school  
43 policies and to complete an economic evaluation. Qualitative data will be collected  
44 from six case study schools to understand the contextual factors that could influence  
45 relationships between school policies, smartphone and social media use and mental  
46 wellbeing.  
47  
48  
49  
50  
51  
52  
53

### 54 **Intervention: School Smartphone Policies that Restrict Daytime Use**

55  
56  
57 The intervention and data capture are directed by our logic model (Figure 1) which  
58 integrates multiple theories and evidence. First, we adhere to displacement theories  
59  
60



1  
2  
3 [19] to propose that reducing the time adolescents spend on phones/media (i.e.  
4 restricting school time use) is optimal for mental wellbeing. Overuse can displace other  
5 mental wellbeing promoting activities (e.g. sleep and physical activity) and very low  
6 use can deprive adolescents of interactions that support mental wellbeing (e.g., affect  
7 and relationships) [19, 21, 23]. Second, psychological motives drive phone/media use;  
8 motives related to enhancement and social interactions promote mental wellbeing, and  
9 motives related to coping and conformity (e.g. Fear of Missing Out) are associated  
10 with problematic use (addiction) and poor mental wellbeing [49, 50]. Hence the school  
11 policy and ethos have the potential to influence adolescents' motives for using  
12 phones/media, which may impact on mental wellbeing. Third, the ecological model of  
13 social influence proposes three agents that shape wellbeing and technology use,  
14 including the school environment, home/family and individual factors [51]. Finally,  
15 policy enactment and implementation process models [39, 52, 53] identify that school  
16 policy implementation effects will be shaped by social processes (e.g., training,  
17 leadership, compliance, administration, family-school interactions).  
18  
19  
20  
21  
22  
23  
24  
25  
26  
27  
28  
29  
30

31 [Figure 1]  
32  
33

34 **Figure 1.** Logic model and theory of change for the influence of school policies that  
35 restrict daytime use of smartphones on mental wellbeing and other associated  
36 behavioural and health outcomes in adolescents.  
37  
38  
39

40  
41 Informed by our Patient and Public Involvement (PPI) activities and school smartphone  
42 policy analysis, the components of the intervention (i.e., restrictive school smartphone  
43 policies) are presented in Table 1. In Table 2 we have outlined variations in school  
44 smartphone policies and our classification of these variations into two school policy  
45 groups: restrictive (intervention) and permissive (comparator).  
46  
47  
48  
49  
50  
51  
52  
53  
54  
55  
56  
57  
58  
59  
60

**Table 1.** Components of the intervention, guided by the template for intervention description and replication (TiDieR) checklist [54].

| TiDieR Components      | SMART Schools Intervention                                                                                                                                                                                                                                                                                                                 |
|------------------------|--------------------------------------------------------------------------------------------------------------------------------------------------------------------------------------------------------------------------------------------------------------------------------------------------------------------------------------------|
| Description            | School policy prohibiting the use of smartphones during the school day                                                                                                                                                                                                                                                                     |
| Materials              | The policy may be communicated to parents/carers and adolescents in a variety of ways, such as through school information packs, assemblies, letters and/or the school website                                                                                                                                                             |
| Procedures             | Adolescents are not permitted to use their smartphones during lessons or recreational time in the school day, and their smartphones must not be seen in school during these times                                                                                                                                                          |
| Provider               | Schools (or Multi-Academy Trusts*) develop their own policies, often in consultation with school staff, parents and/or school governors, and in relation to the school ethos                                                                                                                                                               |
| Mode of Delivery       | The Senior Leadership team (SLT) and school staff enact the school policy and are required to administer behavioral consequences for adolescents who use their smartphone during the day, such as smartphone confiscation, detention and/or parent-school meeting                                                                          |
| Time Period            | Schools vary in terms of how long their school smartphone has been implemented                                                                                                                                                                                                                                                             |
| Tailoring              | Schools have developed policies according to their specific school contexts (or Multi-Academy Trusts*). Policies usually apply to the whole school, although in some schools 6 <sup>th</sup> form pupils (age 16+) may be permitted to use their smartphones during the school day (this age group will not be investigated in this study) |
| Adherence and Fidelity | The degree to which pupils and teachers adhere to the school policy, and parents/carers are in support of the policy varies across schools                                                                                                                                                                                                 |

\* Multi-Academy Trusts (MAT) –non-profit companies that manage more than one academy [55].

**Table 2.** Classifications of Variations in School Smartphone Policies as Restrictive (Intervention) and Permissive (Comparator).

| <b>Restrictive School Smartphone Policies (Intervention)</b>                                                                                    | <b>Permissive School Smartphone Policies (Comparator)</b>                                                      |
|-------------------------------------------------------------------------------------------------------------------------------------------------|----------------------------------------------------------------------------------------------------------------|
| Allow smartphones onto school premises but insist these are not to be used during the school day and are turned off and out of sight            | Allow pupils to carry smartphones and use them at any time point during the day                                |
| Allow smartphones onto school premises, but only allow use if sanctioned by teaching staff for educational activities (e.g., use of calculator) | Allow pupils to carry smartphones and use them at specific time points during the day (e.g., breaks and lunch) |
| Allow smartphones onto premises but insist they are left in a specified place during the school day e.g., school reception or lockers           | Allow pupils to carry smartphones and use them for personal use with consent from school staff                 |
| Pupils are not allowed to carry their smartphones onto school premises at any time                                                              | Allow pupils to carry smartphones and use within designated areas or zones                                     |

## Study Setting

The sampling frame comprises UK secondary schools (ages 11-19) located within a 100-mile radius of the recruiting centre in the West Midlands. 64 local authorities are included in the sampling frame from the West Midlands, East Midlands, East, South East, South West and North West. The schools are situated in regions of high and low levels of deprivation and in areas that have high [56] and low proportions of Black, Asian and Minority Ethnic (BAME) groups [57, 58]. Schools other than state-funded mainstream schools (special schools, pupil referral units and independent schools) were excluded because it was expected that there would be additional influences on mental wellbeing. Schools that did not have an accessible smartphone policy and/or had different smartphone policies for the year groups 8 and 10, and schools with missing data that was required for the propensity score estimation (see sampling and participants) were also excluded (n = 10,810). A total of 1345 secondary schools are included in our sampling frame; 1220 schools with policies classified as restrictive (intervention) and 125 as permissive (comparator).

## Sampling and participants

To improve the comparability of the two school groups, stratified sampling based on propensity scores was employed [59]. We obtained routine data from the Department for Education on the following school characteristics: region; school type; urban or rural; total pupil roll size; Income Deprivation Affecting Children Index (IDACI) [60]; inclusion of a sixth form; selective or non-selective admissions policy; religious affiliation; and the proportion of pupils with the following characteristics: male; from BAME groups; English as an Additional Language; eligible for free school meals; and Special Education Needs. Propensity scores were calculated using restrictive or permissive school smartphone policies as the outcome and school characteristics as explanatory variables. Propensity score terciles were then used to create three groups with subsequent division by restrictive or permissive policy type, resulting in 6 distinct sampling groups. Schools in each group have been randomly ordered and are being invited sequentially to participate, aiming to recruit six to seven schools from each restrictive tercile and three to four from each permissive tercile to achieve a sample size of 20 schools with restrictive and 10 schools with permissive policies.

In participating schools, two classes of mixed ability year 8 (age 12-13) and year 10 (age 14-15) pupils are recruited. We are focusing on adolescents in this age range because of the age of onset and prevalence of mental illness [5], and the prevalence of smartphone and social media use by adolescents aged 12-15 [7, 14, 61]. Within this age range we may also be able to observe potential differences in smartphone/ social media use relationships with wellbeing [33]. For example, year 8 pupils are likely to be newer users of phones/media and physical activity levels begin to decline at this age, particularly among girls [7, 13]. In year 10, pupils are more likely to be established phone/media users, mental wellbeing tends to be lower and this age group are approaching the peak onset of mental health conditions [4]. In addition to adolescent participants, the form teacher for each class recruited (or an equivalent teacher responsible for the class) and a member of SLT who is responsible for the school smartphone policy are recruited from each school.

## Sample size calculation

1  
2  
3  
4 To account for the imbalance of schools in our sample that have permissive (n= 125)  
5 and restrictive policies (n =1220), we are recruiting schools using a 2:1 (restrictive:  
6 permissive) ratio. The primary outcome of mental wellbeing will be measured using  
7 the Warwick-Edinburgh Mental Well-Being Scale (WEMWBS; score range =14-70)  
8 [62]. To detect a mean difference in score of three points (considered the minimum  
9 clinically important difference [62] between the 2 school groups), assuming a SD of  
10 6.8 [63] and an ICC of 0.1 (a conservative estimate [64]), with 90% power and 5%  
11 significance, we require 20 schools in the restrictive and 10 schools in the permissive  
12 smartphone policy groups, with an average cluster size of 39 (1170 pupil participants  
13 in total; 780 in the restrictive, and 390 in the permissive policy groups).

14  
15  
16  
17  
18 In each participating class, we aim to recruit a minimum of 19-20 pupils (67% if  
19 estimated class size n = 30). In studies with multiple layers of clustering (here classes  
20 within schools), it is conservative to treat clusters within clusters as one larger cluster,  
21 which is the approach used here [65].

## 22 23 24 25 26 27 28 29 30 31 32 33 **Recruitment**

34  
35 School recruitment commenced in September 2022 and will continue until December  
36 2023. A study advertisement has been emailed to all schools in the sampling frame.  
37 Following our propensity sampling approach, schools are then invited by post and  
38 email with a telephone follow-up. In participating schools, a School Liaison Member of  
39 staff (SLM) is identified and a school-university contract outlining expected  
40 commitments signed. Subsequently, a member of SLT responsible for the smartphone  
41 policy, and pupils and teachers from the year 8 and year 10 classes are recruited.  
42 £600 compensation is allocated to each school and a £5 voucher per pupil participant.  
43  
44  
45  
46  
47  
48  
49  
50

51 Parents/carers are provided with written detailed information about the study, what  
52 their child's participation will involve and how their child's data will be processed.  
53 Schools are asked to assist in the distribution of this information to parents/carers in  
54 different formats (e.g., email, post, text messages, website etc.). Parents/carers are  
55 asked for active consent but are given the opportunity to complete and return a form  
56 to opt their child out of the study. Pupil, teacher and SLT participants receive written  
57  
58  
59  
60

information about the study and are asked to complete either an online or written consent (or assent) form.

### Data collection

Data collection methods include self-administered surveys for pupils, teachers and a member of the SLT; accelerometer measured physical activity and sleep for pupils; and document analysis. All online surveys are completed using university-approved online survey software (REDCap). Table 3 provides an overview of outcomes, measures and timepoints of evaluation.

**Table 3.** Overview of Outcomes, Measures and Timepoints of Evaluation.

| Outcome                   | Outcome Measures                                                                                                                                                               | Timepoint(s) of evaluation                                       |
|---------------------------|--------------------------------------------------------------------------------------------------------------------------------------------------------------------------------|------------------------------------------------------------------|
| <b>Primary Outcome</b>    |                                                                                                                                                                                |                                                                  |
| Mental Wellbeing          | Warwick-Edinburgh Mental Well-Being Scale (WEMWBS) [62] / pupil survey                                                                                                         | Measured over the past 2 weeks at 2 time points, 4-8 weeks apart |
| <b>Secondary Outcomes</b> |                                                                                                                                                                                |                                                                  |
| Anxiety Symptoms          | Generalized Anxiety Disorder Assessment (GAD-7) [66] / pupil survey                                                                                                            | 1 time point measured over the past 2 weeks                      |
| Depressive Symptoms       | Patient Health Questionnaire (PHQ-9) [67] / pupil survey                                                                                                                       | 1 time point measured over the past 2 weeks                      |
| Addictive Use             | Problematic Social Media use Scale [49, 50] / pupil survey                                                                                                                     | 1 time point based on usual use                                  |
| Sleep                     | Sleep quality (indicated by sleep duration and sleep efficiency / accelerometers<br><br>Time pupils go to sleep and wake time on a school day and a weekend day / pupil survey | Over 7 days / usual behaviours                                   |
| Physical Activity         | Physical activity (total and moderate-to-vigorous intensity (MVPA) / accelerometers                                                                                            | Over 7 days / usual behaviours                                   |
|                           | Active travel and sports/activity club engagement/ pupil survey                                                                                                                | Usual behaviours                                                 |

|    |                                                                                                                                                                                                                                                                                                                  |                                                                                                                                                                                                     |                                           |
|----|------------------------------------------------------------------------------------------------------------------------------------------------------------------------------------------------------------------------------------------------------------------------------------------------------------------|-----------------------------------------------------------------------------------------------------------------------------------------------------------------------------------------------------|-------------------------------------------|
| 1  | Attainment                                                                                                                                                                                                                                                                                                       | Assessment of whether pupils are below, above or working at their target grade in English and Maths / teacher survey                                                                                | 1 time point – most recent assessment     |
| 2  | Disruptive Classroom Behaviour                                                                                                                                                                                                                                                                                   | Pupil Behaviour Questionnaire [68] / teacher survey                                                                                                                                                 | 1 time point – current assessment         |
| 3  | <b>Intermediate Outcomes</b>                                                                                                                                                                                                                                                                                     |                                                                                                                                                                                                     |                                           |
| 4  | Smartphone Use Duration                                                                                                                                                                                                                                                                                          | 3 measures: (i) within school; (ii) over 24-hour period on a school day; (iii) on a weekend day / data captured from iOS and Android smartphones and will be self-reported through the pupil survey | 1 time point                              |
| 5  | Social Media Use Duration                                                                                                                                                                                                                                                                                        | 3 measures: (i) within school; (ii) over 24-hour period on a school day; (iii) on a weekend day / data captured from iOS and Android smartphones and will be self-reported through the pupil survey | 1 time point                              |
| 6  | Motives for Social Media Use                                                                                                                                                                                                                                                                                     | Social Media Motives Questionnaire / pupil survey                                                                                                                                                   | 1 time point measured over past 12 months |
| 7  | <b>Policy Implementation Measures</b>                                                                                                                                                                                                                                                                            |                                                                                                                                                                                                     |                                           |
| 8  | Intervention Components (School Level Data): School Timetable; School Policies (smartphone, mental health, behaviour, e-safety); School Smartphone Policy Details (e.g., rules/key features; time period of implementation; policy communication and understanding; adherence and fidelity and policy rationale) | School Policy Documents<br>School Handbooks<br>School Website Content<br>SLT survey<br>Teacher survey<br>Pupil survey                                                                               | 1 time point                              |
| 9  | Individual Factors (Pupils): age, gender, ethnicity, socio-economic position, eligibility for Free School Meals, and whether pupils have English as an Additional Language and/or Special Educational Needs                                                                                                      | Pupil Survey<br>Teacher Survey                                                                                                                                                                      | 1 time point                              |
| 10 | Contextual Factors: School, Individual, Family/Home                                                                                                                                                                                                                                                              | Focus Groups with school staff, pupils and parents/carers of school pupils                                                                                                                          | 1 time point                              |
| 11 | <b>Economic Variables</b>                                                                                                                                                                                                                                                                                        |                                                                                                                                                                                                     |                                           |
| 12 | Teacher Time Spent Managing Policy                                                                                                                                                                                                                                                                               | SLT Survey<br>Teacher survey                                                                                                                                                                        | 1 time point                              |

|                                                                          |                                                                 |                                   |
|--------------------------------------------------------------------------|-----------------------------------------------------------------|-----------------------------------|
| Indirect Time Spent Managing Behavioural Problems<br>Other Related Costs |                                                                 |                                   |
| Health-related quality of life /<br>Quality Adjusted Life Years          | The Child Health Utility Instrument (CHU9D) [69] / pupil survey | 1 time point / current assessment |

### Pupil Online Survey

Pupils complete an online survey at one time point (in school time) that includes validated measures for mental wellbeing, anxiety and depressive symptoms, addictive social media use, motives for social media use, health-related quality of life and demographic variables (e.g., age, gender) (Table 3). Within the survey pupils are asked to self-report data on their physical activity levels, sleep and phone/media use, and by using data from their iOS or Android apps, they additionally self-report data on time spent on their smartphone and social media apps (Table 3). Within the survey pupils are also asked to report on their knowledge and understanding of the school smartphone policy and compliance with the school smartphone policy. The survey is completed on encrypted tablets, using a portable Wi-Fi hub owned by the research team.

### *Secondary measure of mental wellbeing*

A second online survey (in school time) to measure mental wellbeing (Table 3) is completed four to eight weeks after pupils have completed the initial online survey. The SLM is sent an email link for pupils to complete.

### Teacher Online Survey

Data are collected from the form teacher (or an equivalent teacher responsible for the class) for each participating pupil on: pupil attainment; classroom behavior; and whether pupils are eligible for free school meals, have a special educational need, or have English as an additional language (Table 3). Within the survey teachers are also asked to report on their knowledge and understanding of the school smartphone policy, compliance with the school smartphone policy and to report on the time they



1  
2  
3 spend implementing the school smartphone policy (Table 3). Teachers are sent the  
4 online survey by email.  
5  
6  
7

### 8 Senior Leadership Team Online Survey 9

10  
11 The SLT member responsible for the school smartphone policy is asked to complete  
12 survey questions on: the SLT member's role; the school timetable and school policies;  
13 features of the school smartphone policy; perceived time spent by school staff  
14 developing and implementing the school smartphone policy; knowledge and  
15 understanding of the school smartphone policy; and compliance with the school  
16 smartphone policy. The SLT member is sent the online survey by email.  
17  
18  
19  
20  
21  
22

### 23 Accelerometers 24

25 Pupils are asked to wear a wrist worn GENEActiv accelerometer watch for 24 hours a  
26 day for the subsequent seven days after completing the survey [70]. Watches are worn  
27 on the non-dominant wrist during all activities, including water-based activities.  
28 Accelerometers are initialised to collect data in 100Hz. Data will be analysed in R to  
29 produce physical activity and sleep outcomes (Table 3).  
30  
31  
32  
33  
34  
35

### 36 Document Analysis 37

38  
39 School policy documents and handbooks related to smartphones, social media, pupil  
40 behavior, mental health/wellbeing, e-safety/IT policy and the wider school aims and  
41 ethos are collected. Documents related to the school timetable are also collected so  
42 that time spent in physical education, and time allocated for breaks and lunch can be  
43 quantified for each school.  
44  
45  
46  
47  
48  
49  
50

### 51 Case Study Schools 52

53  
54 Six case study schools are being purposively sampled from the 30 participating  
55 schools in relation to two school characteristics: (i) smartphone policy type and  
56 duration to ensure a balance of restrictive (n=3) vs permissive policies (n=3), and a  
57 range of length of policy implementation in the six case studies; and (ii) schools from  
58  
59  
60

1  
2  
3 low, medium and high area of deprivation, measured by the Income Deprivation  
4 Affecting Children Index (IDACI). An additional £300 compensation is allocated to case  
5 study schools.  
6  
7  
8  
9

10 Across the case study schools, up to 36 focus groups (FG) will be completed with  
11 adolescents (n=12), school staff (n=12) and parents/carers (n=12). Data collection is  
12 taking place following the school level data collection (i.e., surveys, accelerometers  
13 and document analysis) and following obtaining written consent (or assent). In each  
14 case study school four to six FGs are completed: adolescents (n=2), school staff (n=1-  
15 2) and parents/carers (n=1-2). Each FG comprises four to six members and aims to  
16 balance gender and ethnicity (where possible). For adolescents, one FG is completed  
17 with year 8 (age 12-13) and one with year 10 (age 14-15) pupils. School staff FGs  
18 include SLT, school governors, teachers and support staff (admin, caretakers,  
19 teaching assistants). Parents/carers of pupils from within the school (excluding 6<sup>th</sup>  
20 form, age 16-19) are recruited.  
21  
22  
23  
24  
25  
26  
27  
28  
29

30 FGs are led by research staff employing established elicitation and semi-structured  
31 interview techniques [71, 72]. Each FG lasts approximately 60 minutes and takes  
32 place in school or online. Data are collected from voice transcription.  
33  
34  
35  
36

## 37 **Data Analysis**

### 38 **Analysis of pupil outcomes**

39  
40  
41 The primary analysis will examine the association between pupil mental wellbeing and  
42 school policy type (restrictive/permissive). Multilevel linear models will be developed,  
43 accounting for repeated measures, clustering of classes and schools and adjusting for  
44 the school-level variables included in the propensity score estimations alongside  
45 relevant individual-level sociodemographic variables. Secondary analyses will use the  
46 same modelling approach investigating differences in the secondary (behavioural and  
47 mental health) and intermediary (smartphone and social media use) outcomes  
48 between school policy groups. Differential association between school policy and the  
49 primary, secondary and intermediary outcomes will also be explored across: (i)  
50 socioeconomic position; (ii) gender; and (iii) ethnicity by including relevant interaction  
51  
52  
53  
54  
55  
56  
57  
58  
59  
60

1  
2  
3 terms in the developed models.  
4  
5

#### 6 Analysis of school policies, documents and websites

7  
8  
9  
10 School policies, documents (e.g. school handbook) and relevant website content will  
11 be analysed using document analysis [73]. This will provide an overview of  
12 smartphone policy content, rationale and communication, and how schools support  
13 pupils to use their smartphones and social media, as well as their mental wellbeing.  
14 We will adopt a comparative approach to compare restrictive and permissive policies.  
15  
16  
17  
18  
19

#### 20 Economic analysis

21  
22  
23 In view of the multiple outcomes of interest, complex nature of school budgets and  
24 emergent nature of economic evaluation of school-based interventions, a cost-  
25 consequence analysis will be conducted through the relevant data collected (Table 3).  
26 This approach has been previously employed for school-based interventions [74]. In  
27 addition to the WEMWBS and CHU-9D outcomes, secondary behavioural and health  
28 outcomes outlined in the intervention logic model will be included (Figure 1). An  
29 exploratory cost-utility analysis from the payer (school) perspective will be conducted  
30 to compare incremental education costs and incremental Quality-Adjusted Life-Years  
31 associated with restrictive daytime smartphone use.  
32  
33  
34  
35  
36  
37  
38  
39

#### 40 Qualitative/Case Study Analysis

41  
42  
43 Given the purpose of the case study method to understand complexity and  
44 situatedness [75], coupled with the overarching aim of this study to compare schools  
45 that have restrictive and permissive smartphone policies, it seems appropriate to  
46 analyse the case study data taking a dual approach. Thus, each case study will be  
47 analysed individually using a thematic analysis [76], and then multiple case analysis  
48 will be adopted [77]. Following this approach, the findings will then be reported in  
49 detailed 'vertical' case reports on single schools, and in multiple case thematic  
50 analysis [77].  
51  
52  
53  
54  
55  
56  
57

#### 58 Patient and Public Involvement (PPI)

1  
2  
3 During research plan development, a teacher member of the investigator team advised  
4 on the study. We also consulted with adolescents and teachers through an online  
5 survey (teachers n= 40) and five FG consultations (teachers n=11; adolescents n=20).  
6  
7 In addition, we undertook analysis of school websites to determine the nature of school  
8 smartphone policies. Information gathered through these activities helped to inform  
9 and refine the study design, including categorization of school policy types, research  
10 questions, data collection methods, primary and secondary outcomes and the logic  
11 model (Figure 1).  
12  
13  
14  
15  
16  
17  
18

19 The approach to PPI during the SMART Schools Study has been constructed based  
20 on National Institute for Health Research guidelines [78, 79]. We are engaging with  
21 two groups throughout the study: (i) adolescents (from secondary schools); and (ii)  
22 adults (from schools/teachers, parents/families, local/national health organizations  
23 and policy). These groups are directly impacted by the research and are  
24 representative of key stakeholders who would act on the findings. We have one PPI  
25 Lead and a PPI Co-applicant, who are leading on PPI activities. Throughout the study  
26 there will be four online meetings per group which will focus on: (i) designing and  
27 managing study procedures; (ii) undertaking the research; and (iii) dissemination. The  
28 results and conclusions from each PPI group meeting will be reported using Guidance  
29 for Reporting Involvement of Patients and the Public (GRIPP2) checklist [80] for  
30 reporting PPI in research.  
31  
32  
33  
34  
35  
36  
37  
38  
39  
40

## 41 **ETHICS AND DISSEMINATION**

### 42 **Ethical and Regulatory Considerations**

43  
44  
45 Full ethical approval was obtained from the University of Birmingham's Science  
46 Technology, Engineering and Mathematics Research Ethics Committee on 8th July  
47 2022 (ERN\_22-0723). We have also developed a safeguarding protocol for conducting  
48 research on mental health with adolescents. This safeguarding protocol has been  
49 developed in the context of our measure for depression (PHQ-9) that detects whether  
50 adolescents in our sample may have had self-harm or suicidal thoughts in the past two  
51 weeks. The protocol outlines key procedures during recruitment, data collection and  
52 de-briefing periods to safeguard pupils, and include steps related to confidentiality and  
53  
54  
55  
56  
57  
58  
59  
60

1  
2  
3 establishing efficient, secure and effective communication pathways between the  
4 research team and school leaders.  
5  
6  
7

8 Study sponsorship is provided by the University of Birmingham, with provision of  
9 research related costs supported by the National Institute for Health Research (NIHR).  
10 Data management and storage is compliant with the University of Birmingham's  
11 policies and procedures. Participant data from online surveys and other sources will  
12 be pseudo-anonymised, stored on a University of Birmingham secure server and  
13 retained for 10 years through the University's Research Data Archive. Data from this  
14 study will be owned by the University of Birmingham.  
15  
16  
17  
18  
19  
20

21 Study oversight will be guided by an independently chaired Study Steering Committee  
22 (SSC) and a Data Management and Ethics Committee (DMEC). A study monitoring  
23 plan has been developed and agreed upon by the SSC and DMEC. The current  
24 protocol has been reviewed and agreed upon by all members of the SSC and DMEC.  
25  
26  
27  
28  
29

### 30 **Dissemination**

31  
32  
33 Dissemination activities will be co-produced with our PPI participants. We have  
34 planned the following dissemination outputs: Policy briefings and research summaries  
35 for agencies on the impact of school smartphone policies on adolescent mental  
36 wellbeing; Guidelines and resources for schools on the characteristics of school  
37 smartphone and social media policy implementation that positively influence mental  
38 wellbeing; Blogs, podcasts, videos and infographics to raise awareness and  
39 understanding of relationships between smartphones and social media and mental  
40 wellbeing; an NIHR public report that summarises the main project findings; and peer  
41 review and open access publications focused on the main study findings.  
42  
43  
44  
45  
46  
47  
48  
49  
50  
51  
52  
53  
54  
55  
56  
57  
58  
59  
60

## REFERENCES

1. World Health Organization. Adolescent Health [online] 2022. [https://www.who.int/health-topics/adolescent-health#tab=tab\\_1](https://www.who.int/health-topics/adolescent-health#tab=tab_1) (Accessed 23<sup>rd</sup> February 2022).
2. World Health Organization. Health for the World's Adolescents - A Second Change in the Second Decade. Geneva, Switzerland; 2014.
3. NHS Digital. Mental Health of Children and Young People in England 2022- wave 3 follow up to the 2017 survey [online] 2022. <https://digital.nhs.uk/data-and-information/publications/statistical/mental-health-of-children-and-young-people-in-england/2022-follow-up-to-the-2017-survey#> (Accessed 23<sup>rd</sup> February 2022).
4. Kessler RC, Amminger GP, Aduilar-Gaxiola S, et al. Age of onset of mental disorders: a review of recent literature. *Curr Opin Psychiatry* 2007; 20(4):359-64.
5. Kessler RC, Berglund P, Demler O, et al. Lifetime prevalence and age-of-onset distributions of DSM-IV disorders in the National Comorbidity Survey Replication. *Arch Gen Psychiatry* 2005; 62(6):593-602.
6. Colizzi M, Lasalvia A, Ruggeri M. Prevention and early intervention in youth mental health: is it time for a multidisciplinary and trans-diagnostic model for care? *IJMHS* 2020;14(1):23.
7. Patton GC, Sawyer SM, Santelli JS, et al. Our future: a *Lancet* commission on adolescent health and wellbeing. *The Lancet* 2016;387(10036):2423-78.
8. Finning K, Ukoumunne OC, Ford T, et al. The association between child and adolescent depression and poor attendance at school: A systematic review and meta-analysis 2019; 245:928-38.
9. Veldman K, Bültmann U, Stewart RE, et al. Mental health problems and educational attainment in adolescence: 9-year follow-up of the TRAILS study. *PLoS One* 2014;9(7):e101751.
10. Orchard F, Gregory AM, Gradisar M, et al. Self-reported sleep patterns and quality amongst adolescents: cross-sectional and prospective associations with anxiety and depression. *J Child Psychol Psychiatry* 2020;61(10):1126-37.
11. Zimmermann-Sloutskis D, Wanner M, Zimmermann E, et al. Physical activity levels and determinants of change in young adults: a longitudinal panel study. *International Journal of Behavioral Nutrition and Physical Activity* 2010;7(1):2.

12. Rideout V, Peebles A, Mann S, et al. Common Sense census: Media use by tweens and teens, 2021. San Francisco, CA; 2022.
13. Ofcom. Children and parents: media use and attitudes report 2022 [online]. 2022. [https://www.ofcom.org.uk/data/assets/pdf\\_file/0024/234609/childrens-media-use-and-attitudes-report-2022.pdf](https://www.ofcom.org.uk/data/assets/pdf_file/0024/234609/childrens-media-use-and-attitudes-report-2022.pdf) (Accessed 23<sup>rd</sup> February 2022).
14. Ofcom. Children and Parents: Media Use and Attitudes 2023 [online] 2023. [https://www.ofcom.org.uk/data/assets/pdf\\_file/0027/255852/childrens-media-use-and-attitudes-report-2023.pdf](https://www.ofcom.org.uk/data/assets/pdf_file/0027/255852/childrens-media-use-and-attitudes-report-2023.pdf) (Accessed 31st March 2023).
15. Orben A. Teenagers, screens and social media: a narrative review of reviews and key studies. *Social Psychiatry and Psychiatric Epidemiology*. 2020;55(4):407-14.
16. Scott H, Biello SM, Woods HC. Social media use and adolescent sleep patterns: cross-sectional findings from the UK millennium cohort study. *BMJ Open* 2019;9(9):e031161.
17. Plackett R, Sheringham J, Dykxhoorn J. The Longitudinal Impact of Social Media Use on UK Adolescents' Mental Health: Longitudinal Observational Study. *J Med Internet Res* 2023;25:e43213.
18. Brooks F KE, Chester K, Magnusson J, et al. Health Behaviour in School-aged Children (HSBC): World Health Organization Collaborative Cross National Study. Findings from the 2018 HSBC study for England. Hatfield, England; 2020.
19. Przybylski AK, Weinstein N. A Large-Scale Test of the Goldilocks Hypothesis. *Psychol Sci* 2017;28(2):204-15.
20. Przybylski AK, Orben A, Weinstein N. How Much Is Too Much? Examining the Relationship Between Digital Screen Engagement and Psychosocial Functioning in a Confirmatory Cohort Study. *J Am Acad Child Adolesc Psychiatry* 2020;59(9):1080-8.
21. Viner RM, Gireesh A, Stiglic N, et al. Roles of cyberbullying, sleep, and physical activity in mediating the effects of social media use on mental health and wellbeing among young people in England: a secondary analysis of longitudinal data. *Lancet Child Adolesc Health* 2019;3(10):685-96.
22. Yan H, Zhang R, Oniffrey TM, et al. Associations among Screen Time and Unhealthy Behaviors, Academic Performance, and Well-Being in Chinese Adolescents. *Int J Environ Res Public Health* 2017;14(6).
23. Royal College of Psychiatrists. Technology use and the mental health of children and young people [online] 2020. <https://www.rcpsych.ac.uk/docs/default-source/improving-care/better-mh-policy/college-reports/college-report-cr225.pdf> (Accessed 23<sup>rd</sup> February 2022).
24. Dienlin T, Johannes N. The impact of digital technology use on adolescent well-being. *Dialogues in Clinical Neuroscience* 2020;22(2):135-42.
25. Kelly Y ZA, Booker C, Sacker A. Social Media Use and Adolescent Mental Health: Findings From the UK Millennium Cohort Study. *eClinicalMedicine* 2019;6:59-68.
26. Twenge JM, Martin GN, Campbell WK. Decreases in psychological well-being among American adolescents after 2012 and links to screen time during the rise of smartphone technology. *Emotion* 2018;18(6):765-80.
27. Orben A, Przybylski AK. Screens, Teens, and Psychological Well-Being: Evidence From Three Time-Use-Diary Studies. *Association for Psychological Science* 2019;30:682-96.
28. Kandola A, Owen N, Dunstan DW, et al. Prospective relationships of adolescents' screen-based sedentary behaviour with depressive symptoms: the Millennium Cohort Study. *Psych Med* 2022;52(15):3531-9.

29. Sewall CJR, Bear TM, Merranko J, et al. How psychosocial well-being and usage amount predict inaccuracies in retrospective estimates of digital technology use. *Mobile Media & Communication* 2020;8(3):379-99.
30. Patalay P, Fitzsimons E. Development and predictors of mental ill-health and wellbeing from childhood to adolescence. *Soc Psychiatry Psychiatr Epidemiol* 2018;53(12):1311-23.
31. Sport England. Active Lives Children and Young People Survey: Academic Year 2021-22 [online] 2022. [https://sportengland-production-files.s3.eu-west-2.amazonaws.com/s3fs-public/2022-12/Active%20Lives%20Children%20and%20Young%20People%20Survey%20Academic%20Year%202021-22%20Report.pdf?VersionId=R5\\_hmJHw5M4yKFsewm2vGDMRGHWW7q3E](https://sportengland-production-files.s3.eu-west-2.amazonaws.com/s3fs-public/2022-12/Active%20Lives%20Children%20and%20Young%20People%20Survey%20Academic%20Year%202021-22%20Report.pdf?VersionId=R5_hmJHw5M4yKFsewm2vGDMRGHWW7q3E) (Accessed 23<sup>rd</sup> February 2022).
32. NHS. Mental Health of Children and Young People in England, 2017 [PAS] [online] 2018. <https://digital.nhs.uk/data-and-information/publications/statistical/mental-health-of-children-and-young-people-in-england/2017/2017> (Accessed 23<sup>rd</sup> February 2022).
33. Orben A, Przybylski AK, Blakemore S-J, et al. Windows of developmental sensitivity to social media. *Nature Communications* 2022;13(1):1649.
34. Roffery S. *Positive Relationships*. London: Springer; 2012.
35. Salway RE, Emm-Collison L, Sebire S, et al. Associations between socioeconomic position and changes in children's screen-viewing between ages 6 and 9: a longitudinal study. *BMJ Open* 2019;9(12):e027481.
36. Thompson JL, Sebire SJ, Kesten JM, et al. How parents perceive screen viewing in their 5–6 year old child within the context of their own screen viewing time: a mixed-methods study. *BMC Public Health* 2017;17(1):471.
37. Solomon-Moore E, Matthews J, Reid T, et al. Examining the challenges posed to parents by the contemporary screen environments of children: a qualitative investigation. *BMC Pediatrics* 2018;18(1):129.
38. Bonell C, Jamal F, Harden A, et al. Public Health Research. Systematic review of the effects of schools and school environment interventions on health: evidence mapping and synthesis. Southampton: NIHR Journals Library; 2013.
39. Paulus FW, Ohmann S, Popow C. Practitioner Review: School-based interventions in child mental health. *JCPP* 2016;57(12):1337-59.
40. Glazzard J. A whole-school approach to supporting children and young people's mental health. *JPMH* 2019;18(4):256-65.
41. Barker R, Hartwell G, Egan M, et al. The importance of school culture in supporting student mental health in secondary schools. Insights from a qualitative study. *British Educational Research Journal* 2023;00:1-23.
42. Leatherdale ST, Faulkner G, Arbour-Nicitopoulos K. School and student characteristics associated with screen-time sedentary behavior among students in grades 5-8, Ontario, Canada, 2007-2008. *Prev Chronic Dis* 2010;7(6):A128.
43. Katapally TR, Laxer RE, Qian W, et al. Do school physical activity policies and programs have a role in decreasing multiple screen time behaviours among youth? *Prev Med* 2018;110:106-13.
44. Kvardova N VN. Do mobile phone bans work? Rules and the use of technology in school in relation to adolescents' behaviour. Research Report from primary and secondary schools. Brno: Masaruk University; 2019.



- 1
  - 2
  - 3
  - 4
  - 5
  - 6
  - 7
  - 8
  - 9
  - 10
  - 11
  - 12
  - 13
  - 14
  - 15
  - 16
  - 17
  - 18
  - 19
  - 20
  - 21
  - 22
  - 23
  - 24
  - 25
  - 26
  - 27
  - 28
  - 29
  - 30
  - 31
  - 32
  - 33
  - 34
  - 35
  - 36
  - 37
  - 38
  - 39
  - 40
  - 41
  - 42
  - 43
  - 44
  - 45
  - 46
  - 47
  - 48
  - 49
  - 50
  - 51
  - 52
  - 53
  - 54
  - 55
  - 56
  - 57
  - 58
  - 59
  - 60
45. Dix KL, Slee PT, Lawson MJ, et al. Implementation quality of whole-school mental health promotion and students' academic performance. *Child Adolesc Ment Health* 2012;17(1):45-51.
46. Selwyn N, Aagaard J. Banning mobile phones from classrooms—An opportunity to advance understandings of technology addiction, distraction and cyberbullying. *British Journal of Educational Technology* 2021;52(1):8-19.
47. Beland L-P, Murphy R. III Communication: Technology, distraction & student performance. *Labour Economics* 2016;41:61-76.
48. House of Commons. Impact of social media and screen-use on young people's health. London: House of Commons; 2019.
49. Marino C, Vieno A, Altoè G, et al. Factorial validity of the Problematic Facebook Use Scale for adolescents and young adults. *J Behav Addict*. 2017;6(1):5-10.
50. Marino C, Mazzieri E, Caselli G, et al. Motives to use Facebook and problematic Facebook use in adolescents. *J Behav Addict* 2018;7(2):276-83.
51. Livingstone S, Sefton-Green J. *The Class: Living and Learning in the Digital Age*. New York: New York University Press; 2016.
52. Ball S. *Education Debate*. London: Policy Press; 2017.
53. Ball SJ, Maguire M, Braun A. *How schools do policy*. London: Routledge; 2012.
54. Hoffmann TC, Glasziou PP, Boutron I, et al. Better reporting of interventions: template for intervention description and replication (TIDieR) checklist and guide. *BMJ* 2014;348:g1687.
55. Haves E. *Education: multi academy trusts* [online] 2022. <https://lordslibrary.parliament.uk/education-multi-academy-trusts/> (accessed 31<sup>st</sup> March 2022).
56. Office for National Statistics. *Mapping income deprivation at a local authority level* [online] 2021. <https://www.ons.gov.uk/peoplepopulationandcommunity/personalandhouseholdfinances/incomeandwealth/datasets/mappingincomedeprivationatalocalauthoritylevel> (Accessed 23<sup>rd</sup> February 2022).
57. Office for National Statistics. *Ethnicity and National Identity 2012* [online] 2012. <https://www.ons.gov.uk/peoplepopulationandcommunity/culturalidentity/ethnicity/articles/ethnicityandnationalidentityinenglandandwales/2012-12-11#:~:text=The%20West%20Midlands%20had%20a,British%20at%2079.2%20per%20cent> (Accessed 23<sup>rd</sup> February 2022).
58. Office for National Statistics. *Population Characteristics Research Tables 2019* [online] 2019. <https://www.ons.gov.uk/peoplepopulationandcommunity/populationandmigration/populationestimates/datasets/populationcharacteristicsresearchtables> (Accessed 23<sup>rd</sup> February 2022).
59. Rubin DB. Estimating causal effects from large data sets using propensity scores. *Ann Intern Med* 1997;127(8 Pt 2):757-63.
60. Ministry of Housing, Communities & Local Government. *The English Indices of deprivation 2019 (IoD2019)*. London: Ministry of Housing, Communities & Local Government; 2019.
61. Ofcom. *Children and parents: Media use and attitudes report* [online] 2019. [https://www.ofcom.org.uk/\\_data/assets/pdf\\_file/0023/190616/children-media-use-attitudes-2019-report.pdf](https://www.ofcom.org.uk/_data/assets/pdf_file/0023/190616/children-media-use-attitudes-2019-report.pdf) (Accessed 23<sup>rd</sup> February 2022).
62. Warwick Medical School. *Collect, score, analyse and interpret WEMWBS* [online] 2020. <https://warwick.ac.uk/fac/sci/med/research/platform/wemwbs/using/howto/> (Accessed 23<sup>rd</sup> February 2022).

63. Clarke A, Friede T, Putz R, et al. Warwick-Edinburgh Mental Well-being Scale (WEMWBS): Validated for teenage school students in England and Scotland. A mixed methods assessment. *BMC Public Health* 2011;11(1):487.
64. Hale DR, Patalay P, Fitzgerald-Yau N, et al. School-level variation in health outcomes in adolescence: analysis of three longitudinal studies in England. *Prev Sci* 2014;15(4):600-10.
65. Hemming K, Lilford R, Girling AJ. Stepped-wedge cluster randomised controlled trials: a generic framework including parallel and multiple-level designs. *Stat Med* 2015;34(2):181-96.
66. Löwe B, Decker O, Müller S, et al. Validation and standardization of the Generalized Anxiety Disorder Screener (GAD-7) in the general population. *Med Care* 2008;46(3):266-74.
67. Kroenke K, Spitzer RL, Williams JB. The PHQ-9: validity of a brief depression severity measure. *J Gen Intern Med* 2001;16(9):606-13.
68. Allwood M, Allen K, Price A, et al. The reliability and validity of the pupil behaviour questionnaire: a child classroom behaviour assessment tool. *Emotional and Behavioural Difficulties* 2018;23(4):361-71.
69. Furber G, Segal L. The validity of the Child Health Utility instrument (CHU9D) as a routine outcome measure for use in child and adolescent mental health services. *Health and Quality of Life Outcomes* 2015;13(1):22.
70. Dillon CB, Fitzgerald AP, Kearney PM, et al. Number of Days Required to Estimate Habitual Activity Using Wrist-Worn GENEActiv Accelerometer: A Cross-Sectional Study. *PLoS One* 2016;11(5):e0109913.
71. Flick U. *The SAGE Handbook of Qualitative Data Collection* [online] 2018. <https://sk.sagepub.com/reference/the-sage-handbook-of-qualitative-data-collection> (Accessed 31st March 2023).
72. Galletta A. *Mastering the Semi-Structured Interview and Beyond: From Research Design to Analysis and Publication*. New York: New York University Press; 2013.
73. Dalglish SL, Khalid H, McMahon SA. Document analysis in health policy research: the READ approach. *Health Policy and Planning* 2020;35(10):1424-31.
74. Charles JM, Harrington DM, Davies MJ, et al. Micro-costing and a cost-consequence analysis of the 'Girls Active' programme: A cluster randomised controlled trial. *PLoS One* 2019;14(8):e0221276.
75. Stake RE. *The art of case study research*. Thousand Oaks, California: SAGE; 1995.
76. Braun V, Clarke V. Using thematic analysis in psychology. *Qualitative Research in Psychology* 2006;3(2):77-101.
77. Stake RE. *Multiple case study analysis*. New York: Guilford Press; 2006.
78. NIHR. Briefing notes for researchers- public involvement in NHS, health and social care research: NIHR [online] 2021. <https://www.nihr.ac.uk/documents/briefing-notes-for-researchers-public-involvement-in-nhs-health-and-social-care-research/27371#who-should-i-involve> (Accessed 23<sup>rd</sup> February 2022).
79. NIHR. Different experiences: A framework for considering who might be involved in research: NIHR [online] 2021. <https://www.nihr.ac.uk/documents/different-experiences-a-framework-for-considering-who-might-be-involved-in-research/27387> (Accessed 23<sup>rd</sup> February 2022).
80. Staniszewska S, Brett J, Simera I, et al. GRIPP2 reporting checklists: tools to improve reporting of patient and public involvement in research. *BMJ* 2017;358:j3453.

1  
2  
3  
4  
5  
6  
7  
8  
9  
10  
11  
12  
13  
14  
15  
16  
17  
18  
19  
20  
21  
22  
23 **Author contributions:** VG and MP are Chief Investigators and obtained funding for  
24 the study. VG and MP led on protocol development with contribution from all named  
25 authors in the following ways: PA advised on study design and conduct; MM and PP  
26 contributed to MH assessments and analysis; SF lead on physical activity and sleep  
27 data collection and analysis; HA lead on economic evaluation; AS advised on the study  
28 design and statistical analysis plans; BM developed the statistical analysis plan; KJ  
29 advised on school recruitment and data collection procedures and MW and GE lead  
30 on PPI. GW, VG and MP drafted the manuscripts and all authors reviewed and  
31 approved the final draft.  
32

33  
34 **Funding statement:** This project is funded by the NIHR Public Health Research  
35 programme (NIHR131396). The views expressed are those of the author(s) and not  
36 necessarily those of the NIHR or the Department of Health and Social Care.  
37

38  
39 **Competing interests statement:** The authors declare that they have no competing  
40 interests.  
41

42 **Word Count:** 3903  
43

44  
45 **Acknowledgement and disclaimer:** This project is funded by the NIHR Public Health  
46 Research programme (NIHR131396). This paper presents independent research  
47 supported by the NIHR Birmingham Biomedical Research Centre at the University  
48 Hospitals Birmingham NHS Foundation Trust and the University of Birmingham. The  
49 views expressed are those of the author(s) and not necessarily those of the NIHR,  
50 NHS or the Department of Health and Social Care.  
51

52  
53 **Other acknowledgements:** We would like to thank Gareth Evans who is a secondary  
54 school teacher and member of the investigator team for advice on study design and  
55 conduct. We would also like to thank members of the SMART Schools SSC and DMEC  
56 and members of our PPI groups for their advice on the study protocol and conduct.  
57

58 **Patient consent for publication:** Not required.  
59  
60

1  
2  
3 **Provenance and peer review:** The SMART Schools Study protocol has received  
4 external peer review and been approved through the National Institute for Health  
5 Research Public Health Research Programme.  
6

7  
8 **Trial and registration:** ISRCTN77948572 and CRN 52232  
9  
10  
11  
12  
13  
14  
15  
16  
17  
18  
19  
20  
21  
22  
23  
24  
25  
26  
27  
28  
29  
30  
31  
32  
33  
34  
35  
36  
37  
38  
39  
40  
41  
42  
43  
44  
45  
46  
47  
48  
49  
50  
51  
52  
53  
54  
55  
56  
57  
58  
59  
60

For peer review only

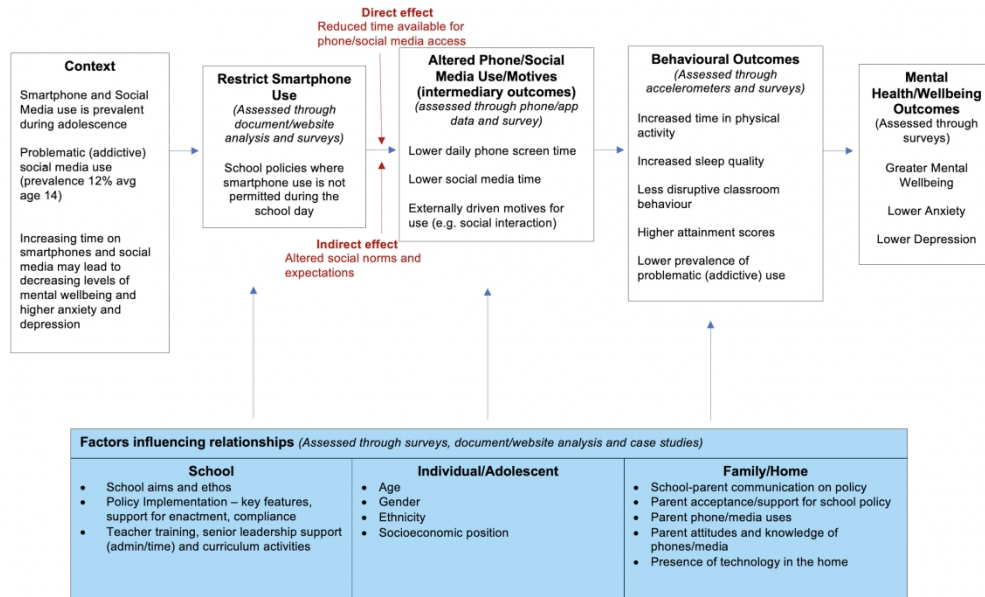

Figure 1. Logic model and theory of change for the influence of school policies that restrict daytime use of smartphones on mental wellbeing and other associated behavioural and health outcomes in adolescents.

411x248mm (300 x 300 DPI)

## The TIDieR (Template for Intervention Description and Replication) Checklist\*:

Information to include when describing an intervention and the location of the information

| Item number       | Item                                                                                                                                                                                                                                                                                                                                                                                                                                                                                                                                                                                                                                                                                    | Where located **                        |                                                                                                                                                                                                                 |
|-------------------|-----------------------------------------------------------------------------------------------------------------------------------------------------------------------------------------------------------------------------------------------------------------------------------------------------------------------------------------------------------------------------------------------------------------------------------------------------------------------------------------------------------------------------------------------------------------------------------------------------------------------------------------------------------------------------------------|-----------------------------------------|-----------------------------------------------------------------------------------------------------------------------------------------------------------------------------------------------------------------|
|                   |                                                                                                                                                                                                                                                                                                                                                                                                                                                                                                                                                                                                                                                                                         | Primary paper (page or appendix number) | Other † (details)                                                                                                                                                                                               |
| <b>BRIEF NAME</b> |                                                                                                                                                                                                                                                                                                                                                                                                                                                                                                                                                                                                                                                                                         |                                         |                                                                                                                                                                                                                 |
| 1.                | <p><i>Name:</i> SMART Schools Study Smartphones, social Media and Adolescent mental wellbeing: the impact of school policies Restricting dayTime use</p> <p><i>Description:</i> The impact of school daytime restrictions of smartphone and social media use on adolescent mental wellbeing (primary outcome), anxiety, depression, physical activity, sleep, classroom behaviour, attainment, and addictive social media use.</p>                                                                                                                                                                                                                                                      | P1, P6                                  | P1 (NHS Health Research Authority (2023) SMART Schools Protocol V6 Available from: <a href="https://www.fundingwards.nihr.ac.uk/award/NIHR131396">https://www.fundingwards.nihr.ac.uk/award/NIHR131396</a> )    |
| <b>WHY</b>        |                                                                                                                                                                                                                                                                                                                                                                                                                                                                                                                                                                                                                                                                                         |                                         |                                                                                                                                                                                                                 |
| 2.                | <p><i>Rationale:</i> Globally, mental disorders (e.g. anxiety and depression) are the leading cause of disability in adolescents (age range 10-19). At the same time, smartphone and social media use is prevalent during adolescence, and accounts for the majority of their overall screen time. At higher levels of use, time spent on smartphones and social media are associated with decreasing levels of mental wellbeing and higher levels of anxiety and depression.</p> <p>There is considerable evidence that school-based interventions can have beneficial effects on adolescent mental wellbeing and associated behavioural outcomes (e.g., sleep, physical activity,</p> | P4-9; Figure 1 on P7, Table 2 on P9     | P1-5 (NHS Health Research Authority (2023) SMART Schools Protocol V6. Available from: <a href="https://www.fundingwards.nihr.ac.uk/award/NIHR131396">https://www.fundingwards.nihr.ac.uk/award/NIHR131396</a> ) |

classroom behaviour and attainment). School phone policies that restrict daytime phone/media use are an example of a current whole-school environment intervention.

*Goal:* We suggest that these policies have the potential to lower the overall time adolescents spend on the smartphones/social media, which may improve mental wellbeing and associated behavioural outcomes. There are variations in school-based policies, and these are classified as:

Table 2. Classifications of Variations in School Smartphone Policies as Restrictive (Intervention) and Permissive (Comparator) (P9).

| Permissive School Phone Policies (Control)                                                                       | Restrictive School Phone Policies (Intervention)                                                                                                        |
|------------------------------------------------------------------------------------------------------------------|---------------------------------------------------------------------------------------------------------------------------------------------------------|
| Allow pupils to carry phones on them and use them at any time point during the day                               | Allow phones onto school premises but insist these are not to be used during the school day and are turned off and out of site                          |
| Allow pupils to carry phones on them and use them at specific time points during the day (e.g. breaks and lunch) | Allow phones onto school premises, but only allow use of the phones if sanctioned by teaching staff for educational activities (e.g. use of calculator) |
| Allow pupils to carry phones on them and use them for personal use with consent from school staff                | Allow phones onto premises but insist that phones are left in a particular place during the school day e.g. school reception                            |
| Allow pupils to carry phones on them and use within designated areas or zones                                    | Pupils are not allowed to carry their phones on school premises all together                                                                            |

*Theory:* The intervention and data capture are directed by our logic model (Figure 1, P which integrates multiple theories and evidence. First, we adhere to displacement theories to propose that reducing the time adolescents spend on phones/media (i.e. restricting school time use) is optimal for mental wellbeing. Overuse can displace other mental wellbeing promoting activities (e.g. sleep and physical activity) and very low use can deprive adolescents of interactions that support mental wellbeing (e.g., affect and relationships). Second, psychological motives drive phone/media use; motives related to

enhancement and social interactions promote mental wellbeing, and motives related to coping and conformity (e.g. Fear of Missing Out) are associated with problematic use (addiction) and poor mental wellbeing. Hence the school policy and ethos have the potential to influence adolescents' motives for using phones/media, which may impact on mental wellbeing. Third, the ecological model of social influence proposes three agents that shape wellbeing and technology use, including the school environment, home/family and individual factors. Finally, policy enactment and implementation process models identify that school policy implementation effects will be shaped by social processes (e.g., training, leadership, compliance, administration, family-school interactions).

### WHAT

- |                                                                                                                                                                                                                                                                                                                                                                     |                          |                                                                                                                                                                                                                                        |
|---------------------------------------------------------------------------------------------------------------------------------------------------------------------------------------------------------------------------------------------------------------------------------------------------------------------------------------------------------------------|--------------------------|----------------------------------------------------------------------------------------------------------------------------------------------------------------------------------------------------------------------------------------|
| <p>3. <i>Materials:</i> Materials for the intervention are context dependent and will vary across schools implementing a restrictive phone policy. Based on our PPI activities, materials may include policy documents; policy communication with parents and adolescents e.g. through school information packs, assemblies, letters and/or the school website.</p> | <p>P7, Table 1 on P8</p> | <p>P7-8, Table 1 on P9 (NHS Health Research Authority (2023) SMART Schools Protocol V6. Available from: <a href="https://www.fundingawards.nihr.ac.uk/award/NIHR131396">https://www.fundingawards.nihr.ac.uk/award/NIHR131396</a>)</p> |
| <p>4. <i>Procedures:</i> Adolescents are not permitted to use their smartphones during lessons or recreational time in the school day, and their smartphones must not be seen in school during these times (except with permission from a teacher)</p>                                                                                                              | <p>Table 2 on P9</p>     | <p>Table 2 on P10 (NHS Health Research Authority (2023) SMART Schools Protocol V6. Available from: <a href="https://www.fundingawards.nihr.ac.uk/award/NIHR131396">https://www.fundingawards.nihr.ac.uk/award/NIHR131396</a>)</p>      |



**WHO PROVIDED**

5. Schools develop their own policies (or these are designed by the school's Multi-Academy Trust), and this policy is communicated to all school staff and pupils. Secondary Schools within the sample (see point 7) vary in regions of high and low levels of deprivation and in areas that have high and low proportions of Black, Asian and Minority Ethnic (BAME) groups.

Types of policies presented in Table 2 on P9

Table 2 on P10 (NHS Health Research Authority (2023) SMART Schools Protocol V6. Available from: <https://www.fundingawards.nihr.ac.uk/award/NIHR131396>)

**HOW**

6. *Mode of delivery:* The restrictive school policy is implemented in school contexts, and thus, a face-to-face format. School staff enact the school policy and, in some schools, are required to administer behavioural consequences for adolescents who use their phone during the day, such as: phone confiscation, detention, parent-school meeting. In the intervention schools the restrictive school policy is applied to pupils in year groups 7-11 (age 11-16 years).

Table 2 on P9, Table 3 on P12

Table 1 on P9, Table 2 on P10 (NHS Health Research Authority (2023) SMART Schools Protocol V6. Available from: <https://www.fundingawards.nihr.ac.uk/award/NIHR131396>)

**WHERE**

7. *Where the intervention occurred:* Secondary schools (ages 11-19) within England and located within a 100-mile radius of the recruiting centre in the West Midlands. 64 local authorities are included in the sampling frame from the West Midlands, East Midlands, East, South East, South West and North West. Secondary schools in the sampling frame (including community schools, foundation and voluntary schools, academies, free schools and colleges), had Senior Leadership Team members, school staff and parents/carers capable of giving informed consent, and school pupils aged 12-13 or 14-15 capable of providing assent were included.

P9-11

P12 (NHS Health Research Authority (2023) SMART Schools Protocol V6. Available from: <https://www.fundingawards.nihr.ac.uk/award/NIHR131396>)

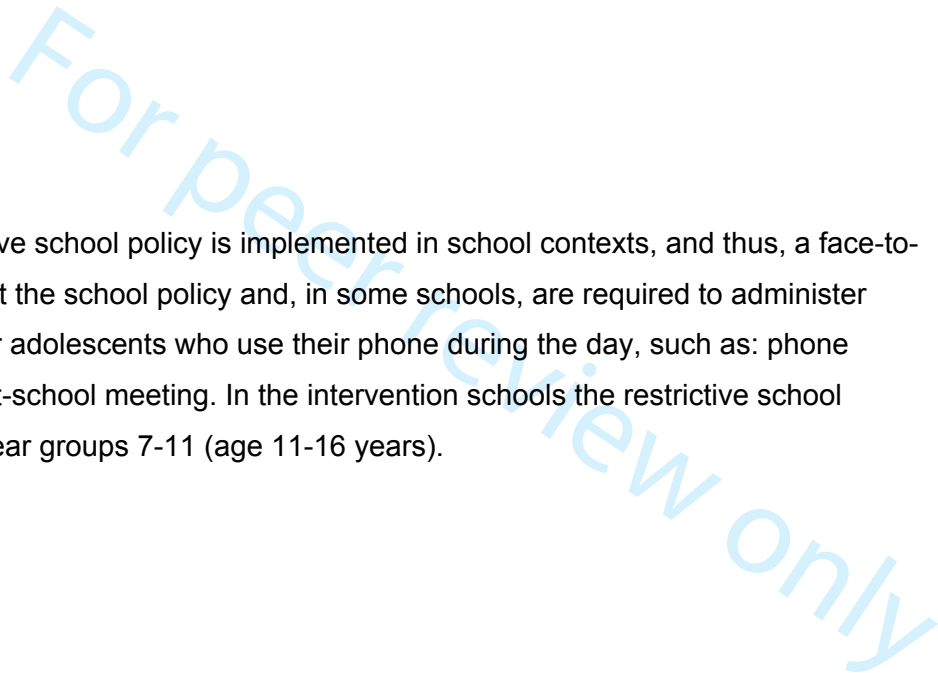

Schools other than state-funded mainstream schools (special schools, pupil referral units and independent schools) were excluded because it was expected that there would be additional influences on mental wellbeing. Schools that did not have an accessible smartphone policy and/or had different smartphone policies for the year groups 8 and 10, and schools with missing data that was required for the propensity score estimation were also excluded.

**8. WHEN and HOW MUCH**

Intervention schools in the sample will already have a restrictive policy implemented, hence this study is a natural experiment and observational study. Intervention schools vary in the level of restrictions for phone/media use, with some restrictive school policies permitting pupil phones to be placed in their bags, whereas others do not permit pupils to bring their phones onto the school premises. Intervention schools vary in the duration that the school phone/media policy has been implemented (e.g. <1, 1, 2, or 3> years).

P6-9, Table 2 on P9

P10 (NHS Health Research Authority (2023) SMART Schools Protocol V6. Available from: <https://www.fundingawards.nihr.ac.uk/award/NIHR131396>)

**TAILORING**

**9.** Schools have developed policies that are tailored to their specific school contexts (or Multi-Academy Trusts). Policies usually apply to the whole school, although in some schools, 6<sup>th</sup> form pupils (age 16+) may be permitted to use their smartphones during the school day (this age group will not be investigated in this study).

Table 1 on P8, Table 2 on P9

Table 2 on P10 (NHS Health Research Authority (2023) SMART Schools Protocol V6. Available from: <https://www.fundingawards.nihr.ac.uk/award/NIHR131396>)

**10. MODIFICATIONS**

N/A

|    |                                                                                                       |                |                                                                                                                                                                                                                    |
|----|-------------------------------------------------------------------------------------------------------|----------------|--------------------------------------------------------------------------------------------------------------------------------------------------------------------------------------------------------------------|
| 1  | N/A                                                                                                   |                |                                                                                                                                                                                                                    |
| 2  |                                                                                                       |                |                                                                                                                                                                                                                    |
| 3  |                                                                                                       |                |                                                                                                                                                                                                                    |
| 4  | <b>11. HOW WELL</b>                                                                                   |                | P11 (NHS Health Research Authority (2023) SMART Schools Protocol V6. Available from: <a href="https://www.fundin-gawards.nihr.ac.uk/award/NIHR131396">https://www.fundin-gawards.nihr.ac.uk/award/NIHR131396</a> ) |
| 5  | Adherence: Adherence of the intervention will be captured by the degree to which pupils, school staff | Table 1 on P8, |                                                                                                                                                                                                                    |
| 6  | and parents adhere to the school policy, and how parents/carers support of the policy varies across   | Table 3 on P12 |                                                                                                                                                                                                                    |
| 7  | schools.                                                                                              |                |                                                                                                                                                                                                                    |
| 8  |                                                                                                       |                |                                                                                                                                                                                                                    |
| 9  |                                                                                                       |                |                                                                                                                                                                                                                    |
| 10 | <b>12.</b>                                                                                            |                |                                                                                                                                                                                                                    |
| 11 |                                                                                                       |                |                                                                                                                                                                                                                    |
| 12 |                                                                                                       |                |                                                                                                                                                                                                                    |
| 13 |                                                                                                       |                |                                                                                                                                                                                                                    |
| 14 |                                                                                                       |                |                                                                                                                                                                                                                    |
| 15 | Actual: N/A                                                                                           | N/A            | N/A                                                                                                                                                                                                                |
| 16 |                                                                                                       |                |                                                                                                                                                                                                                    |
| 17 |                                                                                                       |                |                                                                                                                                                                                                                    |
| 18 |                                                                                                       |                |                                                                                                                                                                                                                    |

\*\* **Authors** - use N/A if an item is not applicable for the intervention being described. **Reviewers** – use ‘?’ if information about the element is not reported/not sufficiently reported.

† If the information is not provided in the primary paper, give details of where this information is available. This may include locations such as a published protocol or other published papers (provide citation details) or a website (provide the URL).

‡ If completing the TIDieR checklist for a protocol, these items are not relevant to the protocol and cannot be described until the study is complete.

\* We strongly recommend using this checklist in conjunction with the TIDieR guide (see *BMJ* 2014;348:g1687) which contains an explanation and elaboration for each item.

\* The focus of TIDieR is on reporting details of the intervention elements (and where relevant, comparison elements) of a study. Other elements and methodological features of studies are covered by other reporting statements and checklists and have not been duplicated as part of the TIDieR checklist. When a **randomised trial** is being reported, the TIDieR checklist should be used in conjunction with the CONSORT statement (see [www.consort-statement.org](http://www.consort-statement.org)) as an extension of **Item 5 of the CONSORT 2010 Statement**. When a **clinical trial protocol** is being reported, the TIDieR checklist should be used in conjunction with the SPIRIT statement as an extension of **Item 11 of the SPIRIT 2013 Statement** (see [www.spirit-statement.org](http://www.spirit-statement.org)). For alternate study designs, TIDieR can be used in conjunction with the appropriate checklist for that study design (see [www.equator-network.org](http://www.equator-network.org)).

# BMJ Open

## Smartphones, social Media and Adolescent mental wellbeing: the impact of school policies Restricting dayTime use—protocol for a natural experimental observational study using mixed methods at secondary schools in England (SMART Schools Study)

|                                 |                                                                                                                                                                                                                                                                                                                                                                                                                                                                                                                                                                                                                                                                                                                                                                                                                                                                                                                                                                                                                                                                                                                                                                                                                                                                                                                                                                                                                                                                                     |
|---------------------------------|-------------------------------------------------------------------------------------------------------------------------------------------------------------------------------------------------------------------------------------------------------------------------------------------------------------------------------------------------------------------------------------------------------------------------------------------------------------------------------------------------------------------------------------------------------------------------------------------------------------------------------------------------------------------------------------------------------------------------------------------------------------------------------------------------------------------------------------------------------------------------------------------------------------------------------------------------------------------------------------------------------------------------------------------------------------------------------------------------------------------------------------------------------------------------------------------------------------------------------------------------------------------------------------------------------------------------------------------------------------------------------------------------------------------------------------------------------------------------------------|
| Journal:                        | <i>BMJ Open</i>                                                                                                                                                                                                                                                                                                                                                                                                                                                                                                                                                                                                                                                                                                                                                                                                                                                                                                                                                                                                                                                                                                                                                                                                                                                                                                                                                                                                                                                                     |
| Manuscript ID                   | bmjopen-2023-075832.R1                                                                                                                                                                                                                                                                                                                                                                                                                                                                                                                                                                                                                                                                                                                                                                                                                                                                                                                                                                                                                                                                                                                                                                                                                                                                                                                                                                                                                                                              |
| Article Type:                   | Protocol                                                                                                                                                                                                                                                                                                                                                                                                                                                                                                                                                                                                                                                                                                                                                                                                                                                                                                                                                                                                                                                                                                                                                                                                                                                                                                                                                                                                                                                                            |
| Date Submitted by the Author:   | 25-May-2023                                                                                                                                                                                                                                                                                                                                                                                                                                                                                                                                                                                                                                                                                                                                                                                                                                                                                                                                                                                                                                                                                                                                                                                                                                                                                                                                                                                                                                                                         |
| Complete List of Authors:       | Wood, Grace; University of Birmingham, School of Sport, Exercise and Rehabilitation Sciences; University of Birmingham Institute for Mental Health<br>Goodyear, Victoria; University of Birmingham School of Sport and Exercise Sciences; University of Birmingham Institute for Mental Health<br>Adab, Peymane; University of Birmingham Institute of Applied Health Research, Public Health<br>Al-Janabi, Hareth; University of Birmingham Institute for Mental Health; University of Birmingham Institute of Applied Health Research<br>Fenton, Sally; University of Birmingham School of Sport and Exercise Sciences, School of Sport, Exercise and Rehabilitation Sciences<br>Jones, Kirsty; Services for Education<br>Michail, Maria; University of Birmingham Institute for Mental Health; University of Birmingham School of Psychology<br>Morrison, Breanna; University of Birmingham Institute of Applied Health Research<br>Patterson, Paul; University of Birmingham Institute for Mental Health; Birmingham Women's and Children's NHS Foundation Trust<br>Sitch, Alice; University of Birmingham Institute of Applied Health Research; NIHR Birmingham Biomedical Research Centre, Institute of Translational Medicine<br>Wade, Matthew; ukactive Research Institute; Sheffield Hallam University College of Health Wellbeing and Life Sciences, Advanced Wellbeing Research Centre<br>Pallan, Miranda; University of Birmingham Institute of Applied Health Research |
| <b>Primary Subject Heading</b>: | Mental health                                                                                                                                                                                                                                                                                                                                                                                                                                                                                                                                                                                                                                                                                                                                                                                                                                                                                                                                                                                                                                                                                                                                                                                                                                                                                                                                                                                                                                                                       |
| Secondary Subject Heading:      | Public health, Epidemiology, Health economics                                                                                                                                                                                                                                                                                                                                                                                                                                                                                                                                                                                                                                                                                                                                                                                                                                                                                                                                                                                                                                                                                                                                                                                                                                                                                                                                                                                                                                       |
| Keywords:                       | Adolescent, MENTAL HEALTH, Schools                                                                                                                                                                                                                                                                                                                                                                                                                                                                                                                                                                                                                                                                                                                                                                                                                                                                                                                                                                                                                                                                                                                                                                                                                                                                                                                                                                                                                                                  |
|                                 |                                                                                                                                                                                                                                                                                                                                                                                                                                                                                                                                                                                                                                                                                                                                                                                                                                                                                                                                                                                                                                                                                                                                                                                                                                                                                                                                                                                                                                                                                     |

1  
2  
3  
4  
5  
6  
7  
8  
9  
10  
11  
12  
13  
14  
15  
16  
17  
18  
19  
20  
21  
22  
23  
24  
25  
26  
27  
28  
29  
30  
31  
32  
33  
34  
35  
36  
37  
38  
39  
40  
41  
42  
43  
44  
45  
46  
47  
48  
49  
50  
51  
52  
53  
54  
55  
56  
57  
58  
59  
60

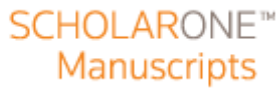

1  
2  
3 **Smartphones, social Media and Adolescent mental wellbeing: the impact of**  
4 **school policies Restricting dayTime use—protocol for a natural experimental**  
5 **observational study using mixed methods at secondary schools in England**  
6 **(SMART Schools Study)**  
7  
8  
9

10 **Authors:** Grace Wood<sup>1,2</sup>, Victoria A. Goodyear<sup>1,2\*</sup>, Peymane Adab<sup>3</sup>, Hareth Al-Janabi<sup>2,3</sup>,  
11 Sally Fenton<sup>1</sup>, Kirsty Jones<sup>4</sup>, Maria Michail<sup>2,5</sup>, Breanna Morrison<sup>3</sup>, Paul Patterson<sup>2,6</sup>, Alice  
12 Sitch<sup>3,7</sup>, Matthew Wade<sup>8,9</sup>, Miranda Pallan<sup>3</sup>.  
13

14 **Affiliations:**

15 <sup>1</sup>School of Sport, Exercise and Rehabilitation Sciences, University of Birmingham,  
16 Birmingham, UK

17 <sup>2</sup>Institute for Mental Health, University of Birmingham, Birmingham, UK

18 <sup>3</sup>Institute of Applied Health Research, University of Birmingham, Birmingham, UK

19 <sup>4</sup>Services for Education, Birmingham, UK

20 <sup>5</sup>School of Psychology, University of Birmingham, Birmingham, UK

21 <sup>6</sup>Birmingham Women's and Children's NHS Foundation Trust, Birmingham, UK

22 <sup>7</sup>NIHR Birmingham Biomedical Research Centre, University Hospitals Birmingham NHS  
23 Foundation Trust and University of Birmingham, Institute of Translational Medicine,  
24 Birmingham, UK

25 <sup>8</sup>ukactive, ukactive Research Institute, London, UK

26 <sup>9</sup>Advanced Wellbeing Research Centre, College of Health, Wellbeing and Life Sciences,  
27 Sheffield Hallam University, Sheffield, UK  
28  
29

30 **\*Correspondence to:**

31 Dr Victoria Goodyear

32 [v.a.goodyear@bham.ac.uk](mailto:v.a.goodyear@bham.ac.uk)  
33  
34  
35  
36  
37  
38  
39  
40  
41  
42  
43  
44  
45  
46  
47  
48  
49  
50  
51  
52  
53  
54  
55  
56  
57  
58  
59  
60

## ABSTRACT

**Introduction:** Smartphone and social media use is prevalent during adolescence, with high levels of use associated with lower levels of mental wellbeing. Secondary schools in the UK have introduced policies that restrict daytime use of smartphones and social media, but there is no evaluation on the impact of these policies on adolescent mental wellbeing. The SMART Schools Study aims to determine the impact of daytime restrictions of smartphone and social media use on indicators of adolescent mental wellbeing, anxiety, depression, physical activity, sleep, classroom behaviour, attainment and addictive social media use.

**Methods and analysis:** This is a natural experimental, cross-sectional observational study using mixed methods. Secondary schools within a 100-mile radius of the recruiting centre in the West Midlands (UK) have been categorised into two groups: Schools that restrict (intervention) and permit (comparator) daytime use of smartphones. We aim to recruit 30 schools (20 restrictive, 10 permissive) and 1170 pupils aged 12-13 and 14-15 years. We will collect data on mental wellbeing, anxiety and depressive symptoms, phone and social media use, sleep and physical activity from pupil surveys, and accelerometers. Policy implementation measures and data on individual pupil factors will be collected through school staff surveys, and website/policy analysis. Six case study schools will explore individual, school and family/home factors that influence relationships between school smartphone policies, smartphone/social media use, and mental wellbeing. Economic evaluation will be completed through a cost-consequence analysis from an education sector perspective.

**Ethics and dissemination:** Ethical approval was obtained from the University of Birmingham's Research Ethics Committee (ERN\_22-0723). Parents/carers of pupil participants can complete a form to opt their child out of the study. Pupil, school staff and parent/carer participants are asked to complete online/written consent (or assent). Findings will be disseminated through policy briefings, resources for schools, social media, reports, and open access publications.

**Study registration:** ISRCTN77948572.

### Strengths and limitations of this study

- This is a natural experimental observational study exploring the impact of school phone policies that restrict daytime use of smartphones and social media on adolescent mental wellbeing and associated behaviours, and the cost implications of these policies from the education sector perspective.
- Pupils will self-report data on time spent on their smartphones and social media by using data from their iOS or Android apps.
- Pupil outcomes will be collected from; an online survey that includes validated measures for mental wellbeing, anxiety and depressive symptoms, addictive social media use, motives for social media use, health-related quality of life and

1  
2  
3 demographic data; and from accelerometers measuring physical activity and  
4 sleep.

- 5 • Qualitative research will explore how individual, school and family/home factors  
6 influence relationships between school phone policies, phone/media use and  
7 mental wellbeing.
- 8 • This is a cross-sectional study and is limited to data collected in England.  
9

10  
11  
12  
13 **KEYWORDS**

14  
15  
16 Smartphones, Social Media, Adolescent Health, Mental Health, Physical Activity,  
17 Secondary Schools, School Policy  
18  
19  
20  
21  
22  
23  
24  
25  
26  
27  
28  
29  
30  
31  
32  
33  
34  
35  
36  
37  
38  
39  
40  
41  
42  
43  
44  
45  
46  
47  
48  
49  
50  
51  
52  
53  
54  
55  
56  
57  
58  
59  
60



## INTRODUCTION

Globally, mental disorders (e.g. anxiety and depression) are the leading cause of disability in adolescents (age range 10-19) [1, 2]. In the UK, one fifth of adolescents (20%) are reported to have a mental health disorder [3], mostly anxiety and depression [2]. Half of all mental health disorders start before the age of 14 [4, 5], and if left untreated, mental health problems are highly likely to persist well into adulthood [2, 6]. Poor mental wellbeing also negatively affects other aspects of adolescents' lives, including cognitive, social and physical behaviours [6, 7]. For example, poor mental wellbeing is associated with higher rates of disruptive behaviour, school absence and lower educational attainment [8, 9]. Sleep problems are also common among adolescents diagnosed with anxiety and depression, and evidence suggests a bidirectional relationship between sleep disturbances and mental health problems [10]. Levels of physical activity also decline significantly during adolescence, and this coincides with increased onset of mental health problems [4, 11]. Hence, adolescence is a crucial period for mental health intervention [7], and there is a pressing need to improve and develop approaches to mental health prevention and intervention [6].

Smartphone and social media use is prevalent during adolescence, and accounts for the majority of their overall screen time [12, 13]. In the UK, most adolescents own a smartphone (98%), and are reported to be active users of social media (93%) [14], with comparable trends reported in other Western populations [15]. Samples in the US and the UK (2021-2022) estimate that the time adolescents spend on smartphones and social media ranges between one and a half hours and eight and a half hours per day [12-14, 16, 17], with most adolescents spending between one and three hours per day [14, 16, 17]. Problematic social media use is also prevalent, with 12% of adolescents in England reported to exhibit addictive use behaviours [18].

In moderation, smartphone and social media use (e.g., <2 hours per day) can be advantageous for mental wellbeing and mental health [19-24], as well as other associated health and behavioural outcomes (e.g. sleep, physical activity, classroom behaviour and attainment). However, at higher levels of use, the reverse effect tends to be seen, with increasing time spent on smartphones and social media associated with decreasing levels of mental wellbeing and higher levels of anxiety and depression

1  
2  
3 [17, 19-21, 23, 25, 26]. Poor academic performance, disruptive classroom behaviour  
4 and less time spent in physical activity and sleep are also more likely in adolescents  
5 who spend a greater proportion of time on smartphones and/or social media [19-23,  
6 25, 26]. Reducing the time adolescents spend on smartphones and social media is  
7 thus a plausible intervention to improve mental wellbeing, possibly operating through  
8 improving the related behavioural outcomes (e.g., physical activity, sleep, academic  
9 performance, classroom behaviour). However, uncertainties in the strength of  
10 associations between smartphone/social media and mental wellbeing exist, and this  
11 is mainly due to reliance on self-reported use [15, 27-29]. Furthermore, individual (e.g.  
12 gender, age, socio-economic status) [13, 16, 30-33] and family/home (e.g. parental  
13 usage and attitudes toward technology) [34-37] factors are also likely to impact on  
14 relationships between smartphone/social media use and mental wellbeing.  
15  
16  
17  
18  
19  
20  
21  
22  
23  
24  
25

26 There is considerable evidence that school-based interventions can have beneficial  
27 effects on adolescent mental wellbeing and associated behavioural outcomes (e.g.,  
28 sleep, physical activity, classroom behaviour and attainment) [38-41]. Whole-school  
29 environment interventions that promote lifestyles conducive to good health are  
30 reported to have a more pronounced effect on mental wellbeing than individual  
31 approaches targeting knowledge and beliefs [38, 42]. A whole-school approach  
32 targets physical and social influences of health, and through the alignment of school  
33 policies, values and practices with effective school leadership, the whole school  
34 approach seeks to promote a set of values, attitudes and behaviours that encourage  
35 the development and maintenance of positive physical, social, cognitive and emotional  
36 habits [38, 40]. Evidence suggests that whole school policies related to health and  
37 wellbeing can: (i) reduce overall screen time; (ii) positively influence mental wellbeing;  
38 and (iii) improve physical activity, sleep, educational attainment and reduce disruptive  
39 classroom behaviour [43-45]. Therefore, whole school policies aiming to influence  
40 smartphone and social media use have the potential to positively impact on  
41 adolescents' mental wellbeing.  
42  
43  
44  
45  
46  
47  
48  
49  
50  
51  
52  
53  
54

55 School phone policies that restrict daytime phone/media use are an example of a  
56 current whole-school environment intervention. In the UK, Australia, Sweden, Czech  
57 Republic and elsewhere, many schools have introduced school policies that restrict  
58 daytime use of smartphones in order to reduce classroom disruptive behaviour and  
59  
60

1  
2  
3 cyberbullying incidents and improve attainment [44, 46, 47]. We suggest that these  
4 policies have the potential to lower the overall time adolescents spend on the  
5 smartphones/social media, which may improve mental wellbeing and associated  
6 behavioural outcomes. However, there is currently no evaluation of the effect of school  
7 smartphone policies on mental wellbeing and there is limited evidence on how  
8 smartphone policies are implemented in schools [48].  
9  
10  
11  
12  
13  
14

15 The SMART Schools Study aims to determine the impact of school daytime  
16 restrictions of smartphone and social media use on adolescent mental wellbeing  
17 (primary outcome), anxiety, depression, physical activity, sleep, classroom behaviour,  
18 attainment, and addictive social media use. We will do this by comparing impacts in  
19 two different secondary school phone policy contexts: (i) schools that do not permit  
20 smartphone use during recreational time in the school day (intervention); and (ii)  
21 schools that permit smartphone use during recreational time (breaks/lunchtimes)  
22 (comparator). We will also explore how variation in school-based, individual and  
23 family/home factors influence the relationship between school phone policies,  
24 smartphone and social media use and mental wellbeing. We will conduct an economic  
25 evaluation in the form of a cost-consequence analysis from an education sector  
26 perspective.  
27  
28  
29  
30  
31  
32  
33  
34  
35  
36  
37

## 38 **METHODS AND ANALYSIS**

39  
40 This is a natural experimental, cross-sectional observational study using mixed  
41 methods, taking place between April 2022 and July 2024. Quantitative and qualitative  
42 data will be collected from all schools in the sample (n=30) to compare outcomes  
43 between restrictive (intervention) and permissive (comparator) school policies and to  
44 complete an economic evaluation. Qualitative data will be collected from six case  
45 study schools to understand the contextual factors that could influence relationships  
46 between school policies, smartphone and social media use and mental wellbeing.  
47  
48  
49  
50  
51  
52  
53

### 54 **Intervention: school smartphone policies that restrict daytime use**

55  
56  
57 The intervention and data capture are directed by our logic model (Figure 1) which  
58 integrates multiple theories and evidence. First, we adhere to displacement theories  
59  
60

[19] to propose that reducing the time adolescents spend on phones/media (i.e. restricting school time use) is optimal for mental wellbeing. Overuse can displace other mental wellbeing promoting activities (e.g. sleep and physical activity) and very low use can deprive adolescents of interactions that support mental wellbeing (e.g., affect and relationships) [19, 21, 23]. Second, psychological motives drive phone/media use; motives related to enhancement and social interactions promote mental wellbeing, and motives related to coping and conformity (e.g. Fear of Missing Out) are associated with problematic use (addiction) and poor mental wellbeing [49, 50]. Hence the school policy and ethos have the potential to influence adolescents' motives for using phones/media, which may impact on mental wellbeing. Third, the ecological model of social influence proposes three agents that shape wellbeing and technology use, including the school environment, home/family and individual factors [51]. Finally, policy enactment and implementation process models [39, 52, 53] identify that school policy implementation effects will be shaped by social processes (e.g., training, leadership, compliance, administration, family-school interactions).

Informed by our Patient and Public Involvement (PPI) activities and school smartphone policy analysis, the components of the intervention (i.e., restrictive school smartphone policies) are presented in Table 1. In Table 2 we have outlined variations in school smartphone policies and our classification of these variations into two school policy groups: restrictive (intervention) and permissive (comparator).

**Table 1.** Components of the intervention, guided by the template for intervention description and replication (TiDieR) checklist [54]

| <b>TiDieR components</b> | <b>SMART Schools intervention</b>                                                                                                                                                 |
|--------------------------|-----------------------------------------------------------------------------------------------------------------------------------------------------------------------------------|
| Description              | School policy prohibiting the use of smartphones during the school day                                                                                                            |
| Materials                | The policy may be communicated to parents/carers and adolescents in a variety of ways, such as through school information packs, assemblies, letters and/or the school website    |
| Procedures               | Adolescents are not permitted to use their smartphones during lessons or recreational time in the school day, and their smartphones must not be seen in school during these times |
| Provider                 | Schools (or Multi-Academy Trusts*) develop their own policies,                                                                                                                    |

|                        |                                                                                                                                                                                                                                                                                                                                            |
|------------------------|--------------------------------------------------------------------------------------------------------------------------------------------------------------------------------------------------------------------------------------------------------------------------------------------------------------------------------------------|
|                        | often in consultation with school staff, parents and/or school governors, and in relation to the school ethos                                                                                                                                                                                                                              |
| Mode of Delivery       | The Senior Leadership team (SLT) and school staff enact the school policy and are required to administer behavioral consequences for adolescents who use their smartphone during the day, such as smartphone confiscation, detention and/or parent-school meeting                                                                          |
| Time Period            | Schools vary in terms of how long their school smartphone has been implemented                                                                                                                                                                                                                                                             |
| Tailoring              | Schools have developed policies according to their specific school contexts (or Multi-Academy Trusts*). Policies usually apply to the whole school, although in some schools 6 <sup>th</sup> form pupils (age 16+) may be permitted to use their smartphones during the school day (this age group will not be investigated in this study) |
| Adherence and Fidelity | The degree to which pupils and teachers adhere to the school policy, and parents/carers are in support of the policy varies across schools                                                                                                                                                                                                 |

\* Multi-Academy Trusts (MAT) –non-profit companies that manage more than one academy [55].

**Table 2.** Classifications of variations in school smartphone policies as restrictive (intervention) and permissive (comparator)

| <b>Restrictive school smartphone policies (intervention)</b>                                                                                    | <b>Permissive school smartphone policies (comparator)</b>                                                      |
|-------------------------------------------------------------------------------------------------------------------------------------------------|----------------------------------------------------------------------------------------------------------------|
| Allow smartphones onto school premises but insist these are not to be used during the school day and are turned off and out of sight            | Allow pupils to carry smartphones and use them at any time point during the day                                |
| Allow smartphones onto school premises, but only allow use if sanctioned by teaching staff for educational activities (e.g., use of calculator) | Allow pupils to carry smartphones and use them at specific time points during the day (e.g., breaks and lunch) |
| Allow smartphones onto premises but insist they are left in a specified place                                                                   | Allow pupils to carry smartphones and use them for personal use with consent from school staff                 |

|                                                                                    |                                                                            |
|------------------------------------------------------------------------------------|----------------------------------------------------------------------------|
| during the school day e.g., school reception or lockers                            |                                                                            |
| Pupils are not allowed to carry their smartphones onto school premises at any time | Allow pupils to carry smartphones and use within designated areas or zones |

## Study setting

The sampling frame comprises UK secondary schools (ages 11-19) located within a 100-mile radius of the recruiting centre in the West Midlands. 64 local authorities are included in the sampling frame from the West Midlands, East Midlands, East, South East, South West and North West. The schools are situated in regions of high and low levels of deprivation and in areas that have high [56] and low proportions of Black, Asian and Minority Ethnic (BAME) groups [57, 58]. Schools other than state-funded mainstream schools (special schools, pupil referral units and independent schools) were excluded because it was expected that there would be additional influences on mental wellbeing. Schools that did not have an accessible smartphone policy and/or had different smartphone policies for the year groups 8 and 10, and schools with missing data that was required for the propensity score estimation (see sampling and participants) were also excluded (n=10,810). A total of 1345 secondary schools are included in our sampling frame; 1220 schools with policies classified as restrictive (intervention) and 125 as permissive (comparator).

## Sampling and participants

To improve the comparability of the two school groups, stratified sampling based on propensity scores was employed [59]. We obtained routine data from the Department for Education on the following school characteristics: region; school type; urban or rural; total pupil roll size; Income Deprivation Affecting Children Index (IDACI) [60]; inclusion of a sixth form; selective or non-selective admissions policy; religious affiliation; and the proportion of pupils with the following characteristics: male; from BAME groups; English as an Additional Language; eligible for free school meals; and Special Education Needs. Propensity scores were calculated using restrictive or permissive school smartphone policies as the outcome and school characteristics as

1  
2  
3 explanatory variables. Propensity score terciles were then used to create three groups  
4 with subsequent division by restrictive or permissive policy type, resulting in 6 distinct  
5 sampling groups. Schools in each group have been randomly ordered and are being  
6 invited sequentially to participate, aiming to recruit six to seven schools from each  
7 restrictive tercile and three to four from each permissive tercile to achieve a sample  
8 size of 20 schools with restrictive and 10 schools with permissive policies.  
9  
10  
11  
12  
13  
14

15 In participating schools, two classes of mixed ability year 8 (age 12-13) and year 10  
16 (age 14-15) pupils are recruited. We are focusing on adolescents in this age range  
17 because of the age of onset and prevalence of mental illness [5], and the prevalence  
18 of smartphone and social media use by adolescents aged 12-15 [7, 14, 61]. Within this  
19 age range we may also be able to observe potential differences in smartphone/ social  
20 media use relationships with wellbeing [33]. For example, year 8 pupils are likely to be  
21 newer users of phones/media and physical activity levels begin to decline at this age,  
22 particularly among girls [7, 13]. In year 10, pupils are more likely to be established  
23 phone/media users, mental wellbeing tends to be lower, and this age group are  
24 approaching the peak onset of mental health conditions [4]. In addition to adolescent  
25 participants, the form teacher for each class recruited (or an equivalent teacher  
26 responsible for the class) and a member of SLT who is responsible for the school  
27 smartphone policy are recruited from each school.  
28  
29  
30  
31  
32  
33  
34  
35  
36  
37  
38

### 39 **Sample size calculation**

40  
41 To account for the imbalance of schools in our sample that have permissive (n=125)  
42 and restrictive policies (n=1220), we are recruiting schools using a 2:1 (restrictive:  
43 permissive) ratio. The primary outcome of mental wellbeing will be measured using  
44 the Warwick-Edinburgh Mental Well-Being Scale (WEMWBS; score range=14-70)  
45 [62]. To detect a mean difference in score of three points (considered the minimum  
46 clinically important difference [62] between the 2 school groups), assuming a SD of  
47 6.8 [63] and an ICC of 0.1 (a conservative estimate [64]), with 90% power and 5%  
48 significance, we require 20 schools in the restrictive and 10 schools in the permissive  
49 smartphone policy groups, with an average cluster size of 39 (1170 pupil participants  
50 in total; 780 in the restrictive, and 390 in the permissive policy groups).  
51  
52  
53  
54  
55  
56  
57  
58  
59  
60

In each participating class, we aim to recruit a minimum of 19-20 pupils (67% if estimated class size  $n=30$ ). In studies with multiple layers of clustering (here classes within schools), it is conservative to treat clusters within clusters as one larger cluster, which is the approach used here [65].

## Recruitment

School recruitment commenced in September 2022 and will continue until December 2023. A study advertisement has been emailed to all schools in the sampling frame. Following our propensity sampling approach, schools are then invited by post and email with a telephone follow-up. In participating schools, a School Liaison Member of staff (SLM) is identified and a school-university contract outlining expected commitments signed. Subsequently, a member of SLT responsible for the smartphone policy, and pupils and teachers from the year 8 and year 10 classes are recruited. £600 compensation is allocated to each school and a £5 voucher per pupil participant. Parents/carers are provided with written detailed information about the study, what their child's participation will involve and how their child's data will be processed. Schools are asked to assist in the distribution of this information to parents/carers in different formats (e.g., email, post, text messages, website etc.).

## Data collection

Data collection methods include self-administered surveys for pupils, teachers and a member of the SLT; accelerometer measured physical activity and sleep for pupils; and document analysis. All online surveys are completed using university-approved online survey software (REDCap). Table 3 provides an overview of outcomes, measures and timepoints of evaluation.

**Table 3.** Overview of outcomes, measures and timepoints of evaluation

| Outcome                | Outcome measures                                                       | Timepoint(s) of evaluation     |
|------------------------|------------------------------------------------------------------------|--------------------------------|
| <b>Primary outcome</b> |                                                                        |                                |
| Mental wellbeing       | Warwick-Edinburgh Mental Well-Being Scale (WEMWBS) [62] / pupil survey | Measured over the past 2 weeks |



|                                       |                                                                                                                                                                                                     |                                                        |
|---------------------------------------|-----------------------------------------------------------------------------------------------------------------------------------------------------------------------------------------------------|--------------------------------------------------------|
|                                       |                                                                                                                                                                                                     | at 2 time points,<br>4-8 weeks apart                   |
| <b>Secondary outcomes</b>             |                                                                                                                                                                                                     |                                                        |
| Anxiety symptoms                      | Generalized Anxiety Disorder Assessment (GAD-7) [66] / pupil survey                                                                                                                                 | 1 time point measured over the past 2 weeks            |
| Depressive symptoms                   | Patient Health Questionnaire (PHQ-9) [67] / pupil survey                                                                                                                                            | 1 time point measured over the past 2 weeks            |
| Addictive use                         | Problematic Social Media use Scale [49, 50] / pupil survey                                                                                                                                          | 1 time point based on usual use                        |
| Sleep                                 | Sleep quality (indicated by sleep duration and sleep efficiency / accelerometers<br><br>Time pupils go to sleep and wake time on a school day and a weekend day / pupil survey                      | Over 7 days / usual behaviours                         |
| Physical activity                     | Physical activity (total and moderate-to-vigorous intensity (MVPA) / accelerometers<br><br>Active travel and sports/activity club engagement/ pupil survey                                          | Over 7 days / usual behaviours<br><br>Usual behaviours |
| Attainment                            | Assessment of whether pupils are below, above or working at their target grade in English and Maths / teacher survey                                                                                | 1 time point – most recent assessment                  |
| Disruptive classroom behaviour        | Pupil Behaviour Questionnaire [68] / teacher survey                                                                                                                                                 | 1 time point – current assessment                      |
| <b>Intermediate outcomes</b>          |                                                                                                                                                                                                     |                                                        |
| Smartphone use duration               | 3 measures: (i) within school; (ii) over 24-hour period on a school day; (iii) on a weekend day / data captured from iOS and Android smartphones and will be self-reported through the pupil survey | 1 time point                                           |
| Social media use duration             | 3 measures: (i) within school; (ii) over 24-hour period on a school day; (iii) on a weekend day / data captured from iOS and Android smartphones and will be self-reported through the pupil survey | 1 time point                                           |
| Motives for social media use          | Social Media Motives Questionnaire / pupil survey                                                                                                                                                   | 1 time point measured over past 12 months              |
| <b>Policy implementation measures</b> |                                                                                                                                                                                                     |                                                        |

|                                                                                                                                                                                                                                                                                                                  |                                                                                                                       |                                   |
|------------------------------------------------------------------------------------------------------------------------------------------------------------------------------------------------------------------------------------------------------------------------------------------------------------------|-----------------------------------------------------------------------------------------------------------------------|-----------------------------------|
| Intervention components (school level data): school timetable; school policies (smartphone, mental health, behaviour, e-safety): school smartphone policy details (e.g., rules/key features; time period of implementation; policy communication and understanding; adherence and fidelity and policy rationale) | School policy documents<br>School handbooks<br>School website content<br>SLT survey<br>Teacher survey<br>Pupil survey | 1 time point                      |
| Individual factors (pupils): age, gender, ethnicity, socio-economic position, eligibility for Free School Meals, and whether pupils have English as an additional language and/or special educational needs                                                                                                      | Pupil survey<br>Teacher survey                                                                                        | 1 time point                      |
| Contextual factors: school, individual, family/home                                                                                                                                                                                                                                                              | Focus groups with school staff, pupils and parents/carers of school pupils                                            | 1 time point                      |
| <b>Economic variables</b>                                                                                                                                                                                                                                                                                        |                                                                                                                       |                                   |
| Teacher time spent managing policy<br>Indirect time spent managing behavioural problems<br>Other related costs                                                                                                                                                                                                   | SLT Survey<br>Teacher survey                                                                                          | 1 time point                      |
| Health-related quality of life / Quality Adjusted Life Years                                                                                                                                                                                                                                                     | The Child Health Utility Instrument (CHU9D) [69] / pupil survey                                                       | 1 time point / current assessment |

### ***Pupil online survey***

Pupils complete an online survey at one time point (in school time) that includes validated measures for mental wellbeing, anxiety and depressive symptoms, addictive social media use, motives for social media use, health-related quality of life and demographic variables (e.g., age, gender) (Table 3). Within the survey pupils are asked to self-report data on their physical activity levels, sleep and phone/media use, and by using data from their iOS or Android apps, they additionally self-report data on time spent on their smartphone and social media apps (Table 3). Within the survey pupils are also asked to report on their knowledge and understanding of the school

1  
2  
3 smartphone policy and compliance with the school smartphone policy The survey is  
4 completed on encrypted tablets, using a portable Wi-Fi hub owned by the research  
5 team.  
6  
7  
8  
9

### 10 *Secondary measure of mental wellbeing*

11  
12  
13 A second online survey (in school time) to measure mental wellbeing (Table 3) is  
14 completed four to eight weeks after pupils have completed the initial online survey.  
15 The SLM is sent an email link for pupils to complete.  
16  
17  
18  
19

### 20 *Teacher online survey*

21  
22  
23 Data are collected from the form teacher (or an equivalent teacher responsible for the  
24 class) for each participating pupil on: pupil attainment; classroom behavior; and  
25 whether pupils are eligible for free school meals, have a special educational need, or  
26 have English as an additional language (Table 3). Within the survey teachers are also  
27 asked to report on their knowledge and understanding of the school smartphone  
28 policy, compliance with the school smartphone policy and to report on the time they  
29 spend implementing the school smartphone policy (Table 3). Teachers are sent the  
30 online survey by email.  
31  
32  
33  
34  
35  
36  
37  
38  
39

### 40 *Senior Leadership Team online survey*

41  
42  
43 The SLT member responsible for the school smartphone policy is asked to complete  
44 survey questions on: the SLT member's role; the school timetable and school policies;  
45 features of the school smartphone policy; perceived time spent by school staff  
46 developing and implementing the school smartphone policy; knowledge and  
47 understanding of the school smartphone policy; and compliance with the school  
48 smartphone policy. The SLT member is sent the online survey by email.  
49  
50  
51  
52  
53

### 54 *Accelerometers*

55  
56 Pupils are asked to wear a wrist worn GENEActiv accelerometer watch for 24 hours a  
57 day for the subsequent seven days after completing the survey [70]. Watches are worn  
58 on the non-dominant wrist during all activities, including water-based activities.  
59  
60

1  
2  
3 Accelerometers are initialised to collect data in 100Hz. Data will be analysed in R to  
4 produce physical activity and sleep outcomes (Table 3).  
5  
6  
7

### 8 ***Document analysis***

9

10  
11 School policy documents and handbooks related to smartphones, social media, pupil  
12 behavior, mental health/wellbeing, e-safety/IT policy and the wider school aims and  
13 ethos are collected. Documents related to the school timetable are also collected so  
14 that time spent in physical education, and time allocated for breaks and lunch can be  
15 quantified for each school.  
16  
17  
18  
19

### 20 **Case study schools**

21  
22  
23

24 Six case study schools are being purposively sampled from the 30 participating  
25 schools in relation to two school characteristics: (i) smartphone policy type and  
26 duration to ensure a balance of restrictive (n=3) vs permissive policies (n=3), and a  
27 range of length of policy implementation in the six case studies; and (ii) schools from  
28 low, medium and high area of deprivation, measured by the Income Deprivation  
29 Affecting Children Index (IDACI). An additional £300 compensation is allocated to case  
30 study schools.  
31  
32  
33  
34  
35  
36  
37  
38  
39

40 Across the case study schools, up to 36 focus groups (FG) will be completed with  
41 adolescents (n=12), school staff (n=12) and parents/carers (n=12). Data collection is  
42 taking place following the school level data collection (i.e., surveys, accelerometers  
43 and document analysis) and following obtaining written consent (or assent). In each  
44 case study school four to six FGs are completed: adolescents (n=2), school staff (n=1-  
45 2) and parents/carers (n=1-2). Each FG comprises four to six members and aims to  
46 balance gender and ethnicity (where possible). For adolescents, one FG is completed  
47 with year 8 (age 12-13) and one with year 10 (age 14-15) pupils. School staff FGs  
48 include SLT, school governors, teachers and support staff (admin, caretakers,  
49 teaching assistants). Parents/carers of pupils from within the school (excluding 6<sup>th</sup>  
50 form, age 16-19) are recruited.  
51  
52  
53  
54  
55  
56  
57  
58  
59  
60

1  
2  
3 FGs are led by research staff employing established elicitation and semi-structured  
4 interview techniques [71, 72]. Each FG lasts approximately 60 minutes and takes  
5 place in school or online. Data are collected from voice transcription.  
6  
7  
8  
9

## 10 **Data analysis**

### 11 ***Analysis of pupil outcomes***

12  
13  
14  
15  
16 The primary analysis will examine the association between pupil mental wellbeing and  
17 school policy type (restrictive/permissive). Multilevel linear models will be developed,  
18 accounting for repeated measures, clustering of classes and schools and adjusting for  
19 the school-level variables included in the propensity score estimations alongside  
20 relevant individual-level sociodemographic variables. Secondary analyses will use the  
21 same modelling approach investigating differences in the secondary (behavioural and  
22 mental health) and intermediary (smartphone and social media use) outcomes  
23 between school policy groups. Differential association between school policy and the  
24 primary, secondary and intermediary outcomes will also be explored across: (i)  
25 socioeconomic position; (ii) gender; and (iii) ethnicity by including relevant interaction  
26 terms in the developed models.  
27  
28  
29  
30  
31  
32  
33  
34  
35  
36

### 37 ***Analysis of school policies, documents and websites***

38  
39  
40 School policies, documents (e.g. school handbook) and relevant website content will  
41 be analysed using document analysis [73]. This will provide an overview of  
42 smartphone policy content, rationale and communication, and how schools support  
43 pupils to use their smartphones and social media, as well as their mental wellbeing.  
44 We will adopt a comparative approach to compare restrictive and permissive policies.  
45  
46  
47  
48  
49  
50

### 51 ***Economic analysis***

52  
53  
54 In view of the multiple outcomes of interest, complex nature of school budgets and  
55 emergent nature of economic evaluation of school-based interventions, a cost-  
56 consequence analysis will be conducted through the relevant data collected (Table 3).  
57 This approach has been previously employed for school-based interventions [74]. In  
58  
59  
60

1  
2  
3 addition to the WEMWBS and CHU-9D outcomes, secondary behavioural and health  
4 outcomes outlined in the intervention logic model will be included (Figure 1). An  
5 exploratory cost-utility analysis from the payer (school) perspective will be conducted  
6 to compare incremental education costs and incremental Quality-Adjusted Life-Years  
7 associated with restrictive daytime smartphone use.  
8  
9  
10  
11  
12

### 13 ***Qualitative/case study analysis***

14  
15  
16 Given the purpose of the case study method to understand complexity and  
17 situatedness [75], coupled with the overarching aim of this study to compare schools  
18 that have restrictive and permissive smartphone policies, it seems appropriate to  
19 analyse the case study data taking a dual approach. Thus, each case study will be  
20 analysed individually using a thematic analysis [76], and then multiple case analysis  
21 will be adopted [77]. Following this approach, the findings will then be reported in  
22 detailed 'vertical' case reports on single schools, and in multiple case thematic  
23 analysis [77].  
24  
25  
26  
27  
28  
29  
30

### 31 **Patient and public involvement**

32  
33 During research plan development, a teacher member of the investigator team advised  
34 on the study. We also consulted with adolescents and teachers through an online  
35 survey (teachers n=40) and five FG consultations (teachers n=11; adolescents n=20).  
36 In addition, we undertook analysis of school websites to determine the nature of school  
37 smartphone policies. Information gathered through these activities helped to inform  
38 and refine the study design, including categorization of school policy types, research  
39 questions, data collection methods, primary and secondary outcomes and the logic  
40 model (Figure 1).  
41  
42  
43  
44  
45  
46  
47  
48

49 The approach to PPI during the SMART Schools Study has been constructed based  
50 on National Institute for Health Research guidelines [78, 79]. We are engaging with  
51 two groups throughout the study: (i) adolescents (from secondary schools); and (ii)  
52 adults (from schools/teachers, parents/families, local/national health organizations  
53 and policy). These groups are directly impacted by the research and are  
54 representative of key stakeholders who would act on the findings. We have one PPI  
55 Lead and a PPI Co-applicant, who are leading on PPI activities. Throughout the study  
56  
57  
58  
59  
60

1  
2  
3 there will be four online meetings per group which will focus on: (i) designing and  
4 managing study procedures; (ii) undertaking the research; and (iii) dissemination. The  
5 results and conclusions from each PPI group meeting will be reported using Guidance  
6 for Reporting Involvement of Patients and the Public (GRIPP2) checklist [80] for  
7 reporting PPI in research.  
8  
9  
10  
11  
12

## 13 **ETHICS AND DISSEMINATION**

### 14 **Ethical and regulatory considerations**

15  
16  
17 Full ethical approval was obtained from the University of Birmingham's Science  
18 Technology, Engineering and Mathematics Research Ethics Committee on 8th July  
19 2022 (ERN\_22-0723).  
20  
21  
22  
23  
24  
25

26  
27 For participation in the study, parents/carers of pupil participants are not asked for  
28 active consent but are given the opportunity to complete and return a form to opt their  
29 child out of taking part in the study. Pupil, teacher, SLT and parent/carer participants  
30 are asked to provide online or written consent (or assent).  
31  
32  
33  
34

35  
36 We have also developed a safeguarding protocol for conducting research on mental  
37 health with adolescents. This safeguarding protocol has been developed in the context  
38 of our measure for depression (PHQ-9) that detects whether adolescents in our  
39 sample may have had self-harm or suicidal thoughts in the past two weeks. The  
40 protocol outlines key procedures during recruitment, data collection and de-briefing  
41 periods to safeguard pupils, and include steps related to confidentiality and  
42 establishing efficient, secure and effective communication pathways between the  
43 research team and school leaders.  
44  
45  
46  
47  
48  
49

50  
51 Study sponsorship is provided by the University of Birmingham, with provision of  
52 research related costs supported by the National Institute for Health Research (NIHR).  
53 Data management and storage is compliant with the University of Birmingham's  
54 policies and procedures. Participant data from online surveys and other sources will  
55 be pseudo-anonymised, stored on a University of Birmingham secure server and  
56  
57  
58  
59  
60

1  
2  
3 retained for 10 years through the University's Research Data Archive. Data from this  
4 study will be owned by the University of Birmingham.  
5  
6  
7

8 Study oversight will be guided by an independently chaired Study Steering Committee  
9 (SSC) and a Data Management and Ethics Committee (DMEC). A study monitoring  
10 plan has been developed and agreed upon by the SSC and DMEC. The current  
11 protocol has been reviewed and agreed upon by all members of the SSC and DMEC.  
12  
13  
14  
15

## 16 **Dissemination**

17  
18  
19  
20 Dissemination activities will be co-produced with our PPI participants. We have  
21 planned the following dissemination outputs: Policy briefings and research summaries  
22 for agencies on the impact of school smartphone policies on adolescent mental  
23 wellbeing; Guidelines and resources for schools on the characteristics of school  
24 smartphone and social media policy implementation that positively influence mental  
25 wellbeing; Blogs, podcasts, videos and infographics to raise awareness and  
26 understanding of relationships between smartphones and social media and mental  
27 wellbeing; an NIHR public report that summarises the main project findings; and peer  
28 review and open access publications focused on the main study findings.  
29  
30  
31  
32  
33  
34  
35  
36  
37  
38  
39  
40  
41  
42  
43  
44  
45  
46  
47  
48  
49  
50  
51  
52  
53  
54  
55  
56  
57  
58  
59  
60



1  
2  
3 **Contributors:** VG and MP are Chief Investigators and obtained funding for the study.  
4 VG and MP led on protocol development with contribution from all named authors in  
5 the following ways: PA advised on study design and conduct; MM and PP contributed  
6 to MH assessments and analysis; SF lead on physical activity and sleep data  
7 collection and analysis; HA lead on economic evaluation; AS advised on the study  
8 design and statistical analysis plans; BM developed the statistical analysis plan; KJ  
9 advised on school recruitment and data collection procedures and MW led on PPI.  
10 GW, VG and MP drafted the manuscripts and all authors reviewed and approved the  
11 final draft.  
12  
13

14 **Funding:** This project is funded by the NIHR Public Health Research programme  
15 (NIHR131396). The views expressed are those of the author(s) and not necessarily  
16 those of the NIHR or the Department of Health and Social Care.  
17  
18

19 **Competing interests:** The authors declare that they have no competing interests.  
20  
21

22 **Word count:** 4065  
23

24 **Disclaimer:** This project is funded by the NIHR Public Health Research programme  
25 (NIHR131396). This paper presents independent research supported by the NIHR  
26 Birmingham Biomedical Research Centre at the University Hospitals Birmingham NHS  
27 Foundation Trust and the University of Birmingham. The views expressed are those  
28 of the author(s) and not necessarily those of the NIHR, NHS or the Department of  
29 Health and Social Care.  
30  
31

32 **Acknowledgements:** We would like to thank Gareth Evans, who is a secondary  
33 school teacher and member of the investigator team, for advice on study design and  
34 conduct. We would also like to thank members of the SMART Schools SSC and DMEC  
35 and members of our PPI groups for their advice on the study protocol and conduct.  
36  
37

38 **Patient consent for publication:** Not required.  
39

40 **Provenance and peer review:** The SMART Schools Study protocol has undergone  
41 external peer review via the study funder and been approved through the National  
42 Institute for Health Research Public Health Research Programme.  
43  
44  
45  
46  
47  
48  
49  
50  
51  
52  
53  
54  
55  
56  
57  
58  
59  
60

## REFERENCES

1. World Health Organization. Adolescent Health [online] 2022. [https://www.who.int/health-topics/adolescent-health#tab=tab\\_1](https://www.who.int/health-topics/adolescent-health#tab=tab_1) (Accessed 23<sup>rd</sup> February 2022).
2. World Health Organization. Health for the World's Adolescents - A Second Change in the Second Decade. Geneva, Switzerland; 2014.
3. NHS Digital. Mental Health of Children and Young People in England 2022- wave 3 follow up to the 2017 survey [online] 2022. <https://digital.nhs.uk/data-and-information/publications/statistical/mental-health-of-children-and-young-people-in-england/2022-follow-up-to-the-2017-survey#> (Accessed 23<sup>rd</sup> February 2022).
4. Kessler RC, Amminger GP, Adular-Gaxiola S, et al. Age of onset of mental disorders: a review of recent literature. *Curr Opin Psychiatry* 2007; 20(4):359-64.
5. Kessler RC, Berglund P, Demler O, et al. Lifetime prevalence and age-of-onset distributions of DSM-IV disorders in the National Comorbidity Survey Replication. *Arch Gen Psychiatry* 2005; 62(6):593-602.
6. Colizzi M, Lasalvia A, Ruggeri M. Prevention and early intervention in youth mental health: is it time for a multidisciplinary and trans-diagnostic model for care? *IJMHS* 2020;14(1):23.
7. Patton GC, Sawyer SM, Santelli JS, et al. Our future: a *Lancet* commission on adolescent health and wellbeing. *The Lancet* 2016;387(10036):2423-78.
8. Finning K, Ukoumunne OC, Ford T, et al. The association between child and adolescent depression and poor attendance at school: A systematic review and meta-analysis 2019; 245:928-38.
9. Veldman K, Bültmann U, Stewart RE, et al. Mental health problems and educational attainment in adolescence: 9-year follow-up of the TRAILS study. *PLoS One* 2014;9(7):e101751.
10. Orchard F, Gregory AM, Gradisar M, et al. Self-reported sleep patterns and quality amongst adolescents: cross-sectional and prospective associations with anxiety and depression. *J Child Psychol Psychiatry* 2020;61(10):1126-37.
11. Zimmermann-Sloutskis D, Wanner M, Zimmermann E, et al. Physical activity levels and determinants of change in young adults: a longitudinal panel study. *International Journal of Behavioral Nutrition and Physical Activity* 2010;7(1):2.
12. Rideout V, Peebles A, Mann S, et al. Common Sense census: Media use by tweens and teens, 2021. San Francisco, CA; 2022.
13. Ofcom. Children and parents: media use and attitudes report 2022 [online]. 2022. [https://www.ofcom.org.uk/data/assets/pdf\\_file/0024/234609/childrens-media-use-and-attitudes-report-2022.pdf](https://www.ofcom.org.uk/data/assets/pdf_file/0024/234609/childrens-media-use-and-attitudes-report-2022.pdf) (Accessed 23<sup>rd</sup> February 2022).
14. Ofcom. Children and Parents: Media Use and Attitudes 2023 [online] 2023. [https://www.ofcom.org.uk/data/assets/pdf\\_file/0027/255852/childrens-media-use-and-attitudes-report-2023.pdf](https://www.ofcom.org.uk/data/assets/pdf_file/0027/255852/childrens-media-use-and-attitudes-report-2023.pdf) (Accessed 31st March 2023).
15. Orben A. Teenagers, screens and social media: a narrative review of reviews and key studies. *Social Psychiatry and Psychiatric Epidemiology*. 2020;55(4):407-14.
16. Scott H, Biello SM, Woods HC. Social media use and adolescent sleep patterns: cross-sectional findings from the UK millennium cohort study. *BMJ Open* 2019;9(9):e031161.
17. Plackett R, Sheringham J, Dykxhoorn J. The Longitudinal Impact of Social Media Use on UK Adolescents' Mental Health: Longitudinal Observational Study. *J Med Internet Res* 2023;25:e43213.

18. Brooks F KE, Chester K, Magnusson J, et al. Health Behaviour in School-aged Children (HSBC): World Health Organization Collaborative Cross National Study. Findings from the 2018 HSBC study for England. Hatfield, England; 2020.
19. Przybylski AK, Weinstein N. A Large-Scale Test of the Goldilocks Hypothesis. *Psychol Sci* 2017;28(2):204-15.
20. Przybylski AK, Orben A, Weinstein N. How Much Is Too Much? Examining the Relationship Between Digital Screen Engagement and Psychosocial Functioning in a Confirmatory Cohort Study. *J Am Acad Child Adolesc Psychiatry* 2020;59(9):1080-8.
21. Viner RM, Gireesh A, Stiglic N, et al. Roles of cyberbullying, sleep, and physical activity in mediating the effects of social media use on mental health and wellbeing among young people in England: a secondary analysis of longitudinal data. *Lancet Child Adolesc Health* 2019;3(10):685-96.
22. Yan H, Zhang R, Oniffrey TM, et al. Associations among Screen Time and Unhealthy Behaviors, Academic Performance, and Well-Being in Chinese Adolescents. *Int J Environ Res Public Health* 2017;14(6).
23. Royal College of Psychiatrists. Technology use and the mental health of children and young people [online] 2020. <https://www.rcpsych.ac.uk/docs/default-source/improving-care/better-mh-policy/college-reports/college-report-cr225.pdf> (Accessed 23<sup>rd</sup> February 2022).
24. Dienlin T, Johannes N. The impact of digital technology use on adolescent well-being. *Dialogues in Clinical Neuroscience* 2020;22(2):135-42.
25. Kelly Y ZA, Booker C, Sacker A. Social Media Use and Adolescent Mental Health: Findings From the UK Millennium Cohort Study. *eClinicalMedicine* 2019;6:59-68.
26. Twenge JM, Martin GN, Campbell WK. Decreases in psychological well-being among American adolescents after 2012 and links to screen time during the rise of smartphone technology. *Emotion* 2018;18(6):765-80.
27. Orben A, Przybylski AK. Screens, Teens, and Psychological Well-Being: Evidence From Three Time-Use-Diary Studies. *Association for Psychological Science* 2019;30:682–96.
28. Kandola A, Owen N, Dunstan DW, et al. Prospective relationships of adolescents' screen-based sedentary behaviour with depressive symptoms: the Millennium Cohort Study. *Psych Med* 2022;52(15):3531-9.
29. Sewall CJR, Bear TM, Merranko J, et al. How psychosocial well-being and usage amount predict inaccuracies in retrospective estimates of digital technology use. *Mobile Media & Communication* 2020;8(3):379-99.
30. Patalay P, Fitzsimons E. Development and predictors of mental ill-health and wellbeing from childhood to adolescence. *Soc Psychiatry Psychiatr Epidemiol* 2018;53(12):1311-23.
31. Sport England. Active Lives Children and Young People Survey: Academic Year 2021-22 [online] 2022. [https://sportengland-production-files.s3.eu-west-2.amazonaws.com/s3fs-public/2022-12/Active%20Lives%20Children%20and%20Young%20People%20Survey%20Academic%20Year%202021-22%20Report.pdf?VersionId=R5\\_hmJHw5M4yKFsewm2vGDMRGHWW7q3E](https://sportengland-production-files.s3.eu-west-2.amazonaws.com/s3fs-public/2022-12/Active%20Lives%20Children%20and%20Young%20People%20Survey%20Academic%20Year%202021-22%20Report.pdf?VersionId=R5_hmJHw5M4yKFsewm2vGDMRGHWW7q3E) (Accessed 23<sup>rd</sup> February 2022).
32. NHS. Mental Health of Children and Young People in England, 2017 [PAS] [online] 2018. <https://digital.nhs.uk/data-and->

- [information/publications/statistical/mental-health-of-children-and-young-people-in-england/2017/2017](#) (Accessed 23<sup>rd</sup> February 2022).
33. Orben A, Przybylski AK, Blakemore S-J, et al. Windows of developmental sensitivity to social media. *Nature Communications* 2022;13(1):1649.
  34. Roffery S. *Positive Relationships*. London: Springer; 2012.
  35. Salway RE, Emm-Collison L, Sebire S, et al. Associations between socioeconomic position and changes in children's screen-viewing between ages 6 and 9: a longitudinal study. *BMJ Open* 2019;9(12):e027481.
  36. Thompson JL, Sebire SJ, Kesten JM, et al. How parents perceive screen viewing in their 5–6 year old child within the context of their own screen viewing time: a mixed-methods study. *BMC Public Health* 2017;17(1):471.
  37. Solomon-Moore E, Matthews J, Reid T, et al. Examining the challenges posed to parents by the contemporary screen environments of children: a qualitative investigation. *BMC Pediatrics* 2018;18(1):129.
  38. Bonell C, Jamal F, Harden A, et al. *Public Health Research. Systematic review of the effects of schools and school environment interventions on health: evidence mapping and synthesis*. Southampton: NIHR Journals Library; 2013.
  39. Paulus FW, Ohmann S, Popow C. *Practitioner Review: School-based interventions in child mental health*. *JCPP* 2016;57(12):1337-59.
  40. Glazzard J. A whole-school approach to supporting children and young people's mental health. *JPMH* 2019;18(4):256-65.
  41. Barker R, Hartwell G, Egan M, et al. The importance of school culture in supporting student mental health in secondary schools. Insights from a qualitative study. *British Educational Research Journal* 2023;00:1-23.
  42. Leatherdale ST, Faulkner G, Arbour-Nicitopoulos K. School and student characteristics associated with screen-time sedentary behavior among students in grades 5-8, Ontario, Canada, 2007-2008. *Prev Chronic Dis* 2010;7(6):A128.
  43. Katapally TR, Laxer RE, Qian W, et al. Do school physical activity policies and programs have a role in decreasing multiple screen time behaviours among youth? *Prev Med* 2018;110:106-13.
  44. Kvardova N VN. *Do mobile phone bans work? Rules and the use of technology in school in relation to adolescents' behaviour*. Research Report from primary and secondary schools. Brno: Masaruk University; 2019.
  45. Dix KL, Slee PT, Lawson MJ, et al. Implementation quality of whole-school mental health promotion and students' academic performance. *Child Adolesc Ment Health* 2012;17(1):45-51.
  46. Selwyn N, Aagaard J. Banning mobile phones from classrooms—An opportunity to advance understandings of technology addiction, distraction and cyberbullying. *British Journal of Educational Technology* 2021;52(1):8-19.
  47. Beland L-P, Murphy R. III *Communication: Technology, distraction & student performance*. *Labour Economics* 2016;41:61-76.
  48. House of Commons. *Impact of social media and screen-use on young people's health*. London: House of Commons; 2019.
  49. Marino C, Vieno A, Altoè G, et al. Factorial validity of the Problematic Facebook Use Scale for adolescents and young adults. *J Behav Addict*. 2017;6(1):5-10.
  50. Marino C, Mazzieri E, Caselli G, et al. Motives to use Facebook and problematic Facebook use in adolescents. *J Behav Addict* 2018;7(2):276-83.
  51. Livingstone S, Sefton-Green J. *The Class: Living and Learning in the Digital Age*. New York: New York University Press; 2016.
  52. Ball S. *Education Debate*. London: Policy Press; 2017.

- 1
  - 2
  - 3
  - 4
  - 5
  - 6
  - 7
  - 8
  - 9
  - 10
  - 11
  - 12
  - 13
  - 14
  - 15
  - 16
  - 17
  - 18
  - 19
  - 20
  - 21
  - 22
  - 23
  - 24
  - 25
  - 26
  - 27
  - 28
  - 29
  - 30
  - 31
  - 32
  - 33
  - 34
  - 35
  - 36
  - 37
  - 38
  - 39
  - 40
  - 41
  - 42
  - 43
  - 44
  - 45
  - 46
  - 47
  - 48
  - 49
  - 50
  - 51
  - 52
  - 53
  - 54
  - 55
  - 56
  - 57
  - 58
  - 59
  - 60
53. Ball SJ, Maguire M, Braun A. How schools do policy. London: Routledge; 2012.
54. Hoffmann TC, Glasziou PP, Boutron I, et al. Better reporting of interventions: template for intervention description and replication (TIDieR) checklist and guide. *BMJ* 2014;348:g1687.
55. Haves E. Education: multi academy trusts [online] 2022. <https://lordslibrary.parliament.uk/education-multi-academy-trusts/> (accessed 31<sup>st</sup> March 2022).
56. Office for National Statistics. Mapping income deprivation at a local authority level [online] 2021. <https://www.ons.gov.uk/peoplepopulationandcommunity/personalandhouseholdfinances/incomeandwealth/datasets/mappingincomedeprivationatalocalauthoritylevel> (Accessed 23<sup>rd</sup> February 2022).
57. Office for National Statistics. Ethnicity and National Identity 2012 [online] 2012. <https://www.ons.gov.uk/peoplepopulationandcommunity/culturalidentity/ethnicity/articles/ethnicityandnationalidentityinenglandandwales/2012-12-11#:~:text=The%20West%20Midlands%20had%20a,British%20at%2079.2%20per%20cent> (Accessed 23<sup>rd</sup> February 2022).
58. Office for National Statistics. Population Characteristics Research Tables 2019 [online] 2019. <https://www.ons.gov.uk/peoplepopulationandcommunity/populationandmigration/populationestimates/datasets/populationcharacteristicsresearchtables> (Accessed 23<sup>rd</sup> February 2022).
59. Rubin DB. Estimating causal effects from large data sets using propensity scores. *Ann Intern Med* 1997;127(8 Pt 2):757-63.
60. Ministry of Housing, Communities & Local Government. The English Indices of deprivation 2019 (IoD2019). London: Ministry of Housing, Communities & Local Government; 2019.
61. Ofcom. Children and parents: Media use and attitudes report [online] 2019. [https://www.ofcom.org.uk/\\_data/assets/pdf\\_file/0023/190616/children-media-use-attitudes-2019-report.pdf](https://www.ofcom.org.uk/_data/assets/pdf_file/0023/190616/children-media-use-attitudes-2019-report.pdf) (Accessed 23<sup>rd</sup> February 2022).
62. Warwick Medical School. Collect, score, analyse and interpret WEMWBS [online] 2020. <https://warwick.ac.uk/fac/sci/med/research/platform/wemwbs/using/howto/> (Accessed 23<sup>rd</sup> February 2022).
63. Clarke A, Friede T, Putz R, et al. Warwick-Edinburgh Mental Well-being Scale (WEMWBS): Validated for teenage school students in England and Scotland. A mixed methods assessment. *BMC Public Health* 2011;11(1):487.
64. Hale DR, Patalay P, Fitzgerald-Yau N, et al. School-level variation in health outcomes in adolescence: analysis of three longitudinal studies in England. *Prev Sci* 2014;15(4):600-10.
65. Hemming K, Lilford R, Girling AJ. Stepped-wedge cluster randomised controlled trials: a generic framework including parallel and multiple-level designs. *Stat Med* 2015;34(2):181-96.
66. Löwe B, Decker O, Müller S, et al. Validation and standardization of the Generalized Anxiety Disorder Screener (GAD-7) in the general population. *Med Care* 2008;46(3):266-74.
67. Kroenke K, Spitzer RL, Williams JB. The PHQ-9: validity of a brief depression severity measure. *J Gen Intern Med* 2001;16(9):606-13.
68. Allwood M, Allen K, Price A, et al. The reliability and validity of the pupil behaviour questionnaire: a child classroom behaviour assessment tool. *Emotional and Behavioural Difficulties* 2018;23(4):361-71.

- 1  
2  
3  
4  
5  
6  
7  
8  
9  
10  
11  
12  
13  
14  
15  
16  
17  
18  
19  
20  
21  
22  
23  
24  
25  
26  
27  
28  
29  
30  
31  
32  
33  
34  
35  
36  
37  
38  
39  
40  
41  
42  
43  
44  
45  
46  
47  
48  
49  
50
69. Furber G, Segal L. The validity of the Child Health Utility instrument (CHU9D) as a routine outcome measure for use in child and adolescent mental health services. *Health and Quality of Life Outcomes* 2015;13(1):22.
  70. Dillon CB, Fitzgerald AP, Kearney PM, et al. Number of Days Required to Estimate Habitual Activity Using Wrist-Worn GENEActiv Accelerometer: A Cross-Sectional Study. *PLoS One* 2016;11(5):e0109913.
  71. Flick U. *The SAGE Handbook of Qualitative Data Collection* [online] 2018. <https://sk.sagepub.com/reference/the-sage-handbook-of-qualitative-data-collection> (Accessed 31st March 2023).
  72. Galletta A. *Mastering the Semi-Structured Interview and Beyond: From Research Design to Analysis and Publication*. New York: New York University Press; 2013.
  73. Dalglish SL, Khalid H, McMahon SA. Document analysis in health policy research: the READ approach. *Health Policy and Planning* 2020;35(10):1424-31.
  74. Charles JM, Harrington DM, Davies MJ, et al. Micro-costing and a cost-consequence analysis of the 'Girls Active' programme: A cluster randomised controlled trial. *PLoS One* 2019;14(8):e0221276.
  75. Stake RE. *The art of case study research*. Thousand Oaks, California: SAGE; 1995.
  76. Braun V, Clarke V. Using thematic analysis in psychology. *Qualitative Research in Psychology* 2006;3(2):77-101.
  77. Stake RE. *Multiple case study analysis*. New York: Guilford Press; 2006.
  78. NIHR. Briefing notes for researchers- public involvement in NHS, health and social care research: NIHR [online] 2021. <https://www.nihr.ac.uk/documents/briefing-notes-for-researchers-public-involvement-in-nhs-health-and-social-care-research/27371#who-should-i-involve> (Accessed 23<sup>rd</sup> February 2022).
  79. NIHR. Different experiences: A framework for considering who might be involved in research: NIHR [online] 2021. <https://www.nihr.ac.uk/documents/different-experiences-a-framework-for-considering-who-might-be-involved-in-research/27387> (Accessed 23<sup>rd</sup> February 2022).
  80. Staniszewska S, Brett J, Simera I, et al. GRIPP2 reporting checklists: tools to improve reporting of patient and public involvement in research. *BMJ* 2017;358:j3453.
- 41  
42  
43  
44  
45  
46  
47  
48  
49  
50

## 51 **FIGURE TITLE**

52  
53  
54  
55 **Figure 1.** Logic model and theory of change for the influence of school policies that  
56 restrict daytime use of smartphones on mental wellbeing and other associated  
57 behavioural and health outcomes in adolescents  
58  
59  
60

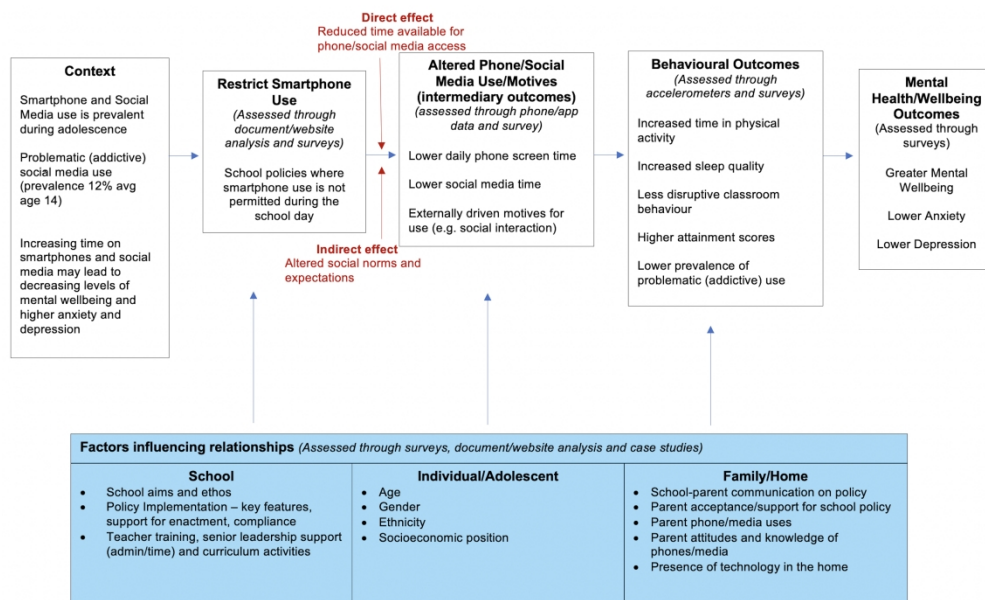

Figure 1. Logic model and theory of change for the influence of school policies that restrict daytime use of smartphones on mental wellbeing and other associated behavioural and health outcomes in adolescents.

411x248mm (300 x 300 DPI)

## The TIDieR (Template for Intervention Description and Replication) Checklist\*:

Information to include when describing an intervention and the location of the information

| Item number       | Item                                                                                                                                                                                                                                                                                                                                                                                                                                                                                                                                                                                                                                                                                    | Where located **                        |                                                                                                                                                                                                                 |
|-------------------|-----------------------------------------------------------------------------------------------------------------------------------------------------------------------------------------------------------------------------------------------------------------------------------------------------------------------------------------------------------------------------------------------------------------------------------------------------------------------------------------------------------------------------------------------------------------------------------------------------------------------------------------------------------------------------------------|-----------------------------------------|-----------------------------------------------------------------------------------------------------------------------------------------------------------------------------------------------------------------|
|                   |                                                                                                                                                                                                                                                                                                                                                                                                                                                                                                                                                                                                                                                                                         | Primary paper (page or appendix number) | Other † (details)                                                                                                                                                                                               |
| <b>BRIEF NAME</b> |                                                                                                                                                                                                                                                                                                                                                                                                                                                                                                                                                                                                                                                                                         |                                         |                                                                                                                                                                                                                 |
| 1.                | <p><i>Name:</i> SMART Schools Study Smartphones, social Media and Adolescent mental wellbeing: the impact of school policies Restricting dayTime use</p> <p><i>Description:</i> The impact of school daytime restrictions of smartphone and social media use on adolescent mental wellbeing (primary outcome), anxiety, depression, physical activity, sleep, classroom behaviour, attainment, and addictive social media use.</p>                                                                                                                                                                                                                                                      | P1, P6                                  | P1 (NHS Health Research Authority (2023) SMART Schools Protocol V6 Available from: <a href="https://www.fundingwards.nihr.ac.uk/award/NIHR131396">https://www.fundingwards.nihr.ac.uk/award/NIHR131396</a> )    |
| <b>WHY</b>        |                                                                                                                                                                                                                                                                                                                                                                                                                                                                                                                                                                                                                                                                                         |                                         |                                                                                                                                                                                                                 |
| 2.                | <p><i>Rationale:</i> Globally, mental disorders (e.g. anxiety and depression) are the leading cause of disability in adolescents (age range 10-19). At the same time, smartphone and social media use is prevalent during adolescence, and accounts for the majority of their overall screen time. At higher levels of use, time spent on smartphones and social media are associated with decreasing levels of mental wellbeing and higher levels of anxiety and depression.</p> <p>There is considerable evidence that school-based interventions can have beneficial effects on adolescent mental wellbeing and associated behavioural outcomes (e.g., sleep, physical activity,</p> | P4-9; Figure 1 on P7, Table 2 on P9     | P1-5 (NHS Health Research Authority (2023) SMART Schools Protocol V6. Available from: <a href="https://www.fundingwards.nihr.ac.uk/award/NIHR131396">https://www.fundingwards.nihr.ac.uk/award/NIHR131396</a> ) |



classroom behaviour and attainment). School phone policies that restrict daytime phone/media use are an example of a current whole-school environment intervention.

*Goal:* We suggest that these policies have the potential to lower the overall time adolescents spend on the smartphones/social media, which may improve mental wellbeing and associated behavioural outcomes. There are variations in school-based policies, and these are classified as:

Table 2. Classifications of Variations in School Smartphone Policies as Restrictive (Intervention) and Permissive (Comparator) (P9).

| Permissive School Phone Policies (Control)                                                                       | Restrictive School Phone Policies (Intervention)                                                                                                        |
|------------------------------------------------------------------------------------------------------------------|---------------------------------------------------------------------------------------------------------------------------------------------------------|
| Allow pupils to carry phones on them and use them at any time point during the day                               | Allow phones onto school premises but insist these are not to be used during the school day and are turned off and out of site                          |
| Allow pupils to carry phones on them and use them at specific time points during the day (e.g. breaks and lunch) | Allow phones onto school premises, but only allow use of the phones if sanctioned by teaching staff for educational activities (e.g. use of calculator) |
| Allow pupils to carry phones on them and use them for personal use with consent from school staff                | Allow phones onto premises but insist that phones are left in a particular place during the school day e.g. school reception                            |
| Allow pupils to carry phones on them and use within designated areas or zones                                    | Pupils are not allowed to carry their phones on school premises all together                                                                            |

*Theory:* The intervention and data capture are directed by our logic model (Figure 1, P which integrates multiple theories and evidence. First, we adhere to displacement theories to propose that reducing the time adolescents spend on phones/media (i.e. restricting school time use) is optimal for mental wellbeing. Overuse can displace other mental wellbeing promoting activities (e.g. sleep and physical activity) and very low use can deprive adolescents of interactions that support mental wellbeing (e.g., affect and relationships). Second, psychological motives drive phone/media use; motives related to

enhancement and social interactions promote mental wellbeing, and motives related to coping and conformity (e.g. Fear of Missing Out) are associated with problematic use (addiction) and poor mental wellbeing. Hence the school policy and ethos have the potential to influence adolescents' motives for using phones/media, which may impact on mental wellbeing. Third, the ecological model of social influence proposes three agents that shape wellbeing and technology use, including the school environment, home/family and individual factors. Finally, policy enactment and implementation process models identify that school policy implementation effects will be shaped by social processes (e.g., training, leadership, compliance, administration, family-school interactions).

### WHAT

- |                                                                                                                                                                                                                                                                                                                                                                     |                          |                                                                                                                                                                                                                                        |
|---------------------------------------------------------------------------------------------------------------------------------------------------------------------------------------------------------------------------------------------------------------------------------------------------------------------------------------------------------------------|--------------------------|----------------------------------------------------------------------------------------------------------------------------------------------------------------------------------------------------------------------------------------|
| <p>3. <i>Materials:</i> Materials for the intervention are context dependent and will vary across schools implementing a restrictive phone policy. Based on our PPI activities, materials may include policy documents; policy communication with parents and adolescents e.g. through school information packs, assemblies, letters and/or the school website.</p> | <p>P7, Table 1 on P8</p> | <p>P7-8, Table 1 on P9 (NHS Health Research Authority (2023) SMART Schools Protocol V6. Available from: <a href="https://www.fundingawards.nihr.ac.uk/award/NIHR131396">https://www.fundingawards.nihr.ac.uk/award/NIHR131396</a>)</p> |
| <p>4. <i>Procedures:</i> Adolescents are not permitted to use their smartphones during lessons or recreational time in the school day, and their smartphones must not be seen in school during these times (except with permission from a teacher)</p>                                                                                                              | <p>Table 2 on P9</p>     | <p>Table 2 on P10 (NHS Health Research Authority (2023) SMART Schools Protocol V6. Available from: <a href="https://www.fundingawards.nihr.ac.uk/award/NIHR131396">https://www.fundingawards.nihr.ac.uk/award/NIHR131396</a>)</p>      |

**WHO PROVIDED**

5. Schools develop their own policies (or these are designed by the school's Multi-Academy Trust), and this policy is communicated to all school staff and pupils. Secondary Schools within the sample (see point 7) vary in regions of high and low levels of deprivation and in areas that have high and low proportions of Black, Asian and Minority Ethnic (BAME) groups.

Types of policies presented in Table 2 on P9

Table 2 on P10 (NHS Health Research Authority (2023) SMART Schools Protocol V6. Available from: <https://www.fundingawards.nihr.ac.uk/award/NIHR131396>)

**HOW**

6. *Mode of delivery:* The restrictive school policy is implemented in school contexts, and thus, a face-to-face format. School staff enact the school policy and, in some schools, are required to administer behavioural consequences for adolescents who use their phone during the day, such as: phone confiscation, detention, parent-school meeting. In the intervention schools the restrictive school policy is applied to pupils in year groups 7-11 (age 11-16 years).

Table 2 on P9, Table 3 on P12

Table 1 on P9, Table 2 on P10 (NHS Health Research Authority (2023) SMART Schools Protocol V6. Available from: <https://www.fundingawards.nihr.ac.uk/award/NIHR131396>)

**WHERE**

7. *Where the intervention occurred:* Secondary schools (ages 11-19) within England and located within a 100-mile radius of the recruiting centre in the West Midlands. 64 local authorities are included in the sampling frame from the West Midlands, East Midlands, East, South East, South West and North West. Secondary schools in the sampling frame (including community schools, foundation and voluntary schools, academies, free schools and colleges), had Senior Leadership Team members, school staff and parents/carers capable of giving informed consent, and school pupils aged 12-13 or 14-15 capable of providing assent were included.

P9-11

P12 (NHS Health Research Authority (2023) SMART Schools Protocol V6. Available from: <https://www.fundingawards.nihr.ac.uk/award/NIHR131396>)

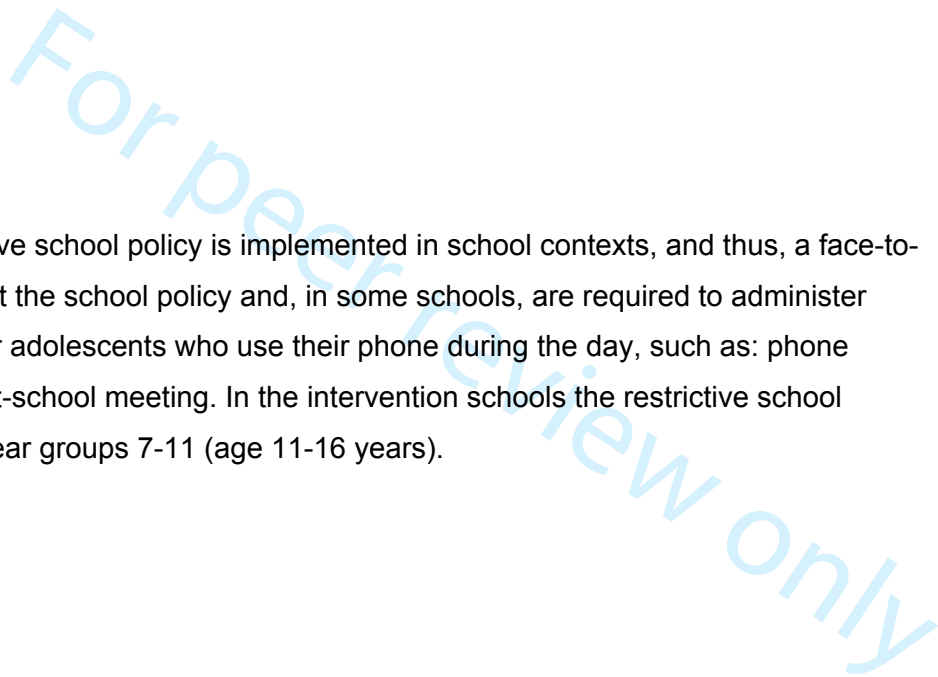

Schools other than state-funded mainstream schools (special schools, pupil referral units and independent schools) were excluded because it was expected that there would be additional influences on mental wellbeing. Schools that did not have an accessible smartphone policy and/or had different smartphone policies for the year groups 8 and 10, and schools with missing data that was required for the propensity score estimation were also excluded.

## 8. WHEN and HOW MUCH

Intervention schools in the sample will already have a restrictive policy implemented, hence this study is a natural experiment and observational study. Intervention schools vary in the level of restrictions for phone/media use, with some restrictive school policies permitting pupil phones to be placed in their bags, whereas others do not permit pupils to bring their phones onto the school premises. Intervention schools vary in the duration that the school phone/media policy has been implemented (e.g. <1, 1, 2, or 3> years).

P6-9, Table 2 on P9

P10 (NHS Health Research Authority (2023) SMART Schools Protocol V6. Available from: <https://www.fundingawards.nihr.ac.uk/award/NIHR131396>)

## TAILORING

9. Schools have developed policies that are tailored to their specific school contexts (or Multi-Academy Trusts). Policies usually apply to the whole school, although in some schools, 6<sup>th</sup> form pupils (age 16+) may be permitted to use their smartphones during the school day (this age group will not be investigated in this study).

Table 1 on P8,  
Table 2 on P9

Table 2 on P10 (NHS Health Research Authority (2023) SMART Schools Protocol V6. Available from: <https://www.fundingawards.nihr.ac.uk/award/NIHR131396>)

## 10. MODIFICATIONS

N/A

|    |                                                                                                       |                |                                                                                                                                                                                                                    |
|----|-------------------------------------------------------------------------------------------------------|----------------|--------------------------------------------------------------------------------------------------------------------------------------------------------------------------------------------------------------------|
| 1  | N/A                                                                                                   |                |                                                                                                                                                                                                                    |
| 2  |                                                                                                       |                |                                                                                                                                                                                                                    |
| 3  |                                                                                                       |                |                                                                                                                                                                                                                    |
| 4  | <b>11. HOW WELL</b>                                                                                   |                | P11 (NHS Health Research Authority (2023) SMART Schools Protocol V6. Available from: <a href="https://www.fundin-gawards.nihr.ac.uk/award/NIHR131396">https://www.fundin-gawards.nihr.ac.uk/award/NIHR131396</a> ) |
| 5  | Adherence: Adherence of the intervention will be captured by the degree to which pupils, school staff | Table 1 on P8, |                                                                                                                                                                                                                    |
| 6  | and parents adhere to the school policy, and how parents/carers support of the policy varies across   | Table 3 on P12 |                                                                                                                                                                                                                    |
| 7  | schools.                                                                                              |                |                                                                                                                                                                                                                    |
| 8  |                                                                                                       |                |                                                                                                                                                                                                                    |
| 9  |                                                                                                       |                |                                                                                                                                                                                                                    |
| 10 | <b>12.</b>                                                                                            |                |                                                                                                                                                                                                                    |
| 11 |                                                                                                       |                |                                                                                                                                                                                                                    |
| 12 |                                                                                                       |                |                                                                                                                                                                                                                    |
| 13 |                                                                                                       |                |                                                                                                                                                                                                                    |
| 14 |                                                                                                       |                |                                                                                                                                                                                                                    |
| 15 | Actual: N/A                                                                                           | N/A            | N/A                                                                                                                                                                                                                |
| 16 |                                                                                                       |                |                                                                                                                                                                                                                    |
| 17 |                                                                                                       |                |                                                                                                                                                                                                                    |
| 18 |                                                                                                       |                |                                                                                                                                                                                                                    |

\*\* **Authors** - use N/A if an item is not applicable for the intervention being described. **Reviewers** – use ‘?’ if information about the element is not reported/not sufficiently reported.

† If the information is not provided in the primary paper, give details of where this information is available. This may include locations such as a published protocol or other published papers (provide citation details) or a website (provide the URL).

‡ If completing the TIDieR checklist for a protocol, these items are not relevant to the protocol and cannot be described until the study is complete.

\* We strongly recommend using this checklist in conjunction with the TIDieR guide (see *BMJ* 2014;348:g1687) which contains an explanation and elaboration for each item.

\* The focus of TIDieR is on reporting details of the intervention elements (and where relevant, comparison elements) of a study. Other elements and methodological features of studies are covered by other reporting statements and checklists and have not been duplicated as part of the TIDieR checklist. When a **randomised trial** is being reported, the TIDieR checklist should be used in conjunction with the CONSORT statement (see [www.consort-statement.org](http://www.consort-statement.org)) as an extension of **Item 5 of the CONSORT 2010 Statement**. When a **clinical trial protocol** is being reported, the TIDieR checklist should be used in conjunction with the SPIRIT statement as an extension of **Item 11 of the SPIRIT 2013 Statement** (see [www.spirit-statement.org](http://www.spirit-statement.org)). For alternate study designs, TIDieR can be used in conjunction with the appropriate checklist for that study design (see [www.equator-network.org](http://www.equator-network.org)).
